1 **Acute stress induces long-lasting alterations in the**  
2 **dopaminergic system of female mice**

3  
4  
5  
6  
7  
8  
9

Romy Wichmann<sup>1,5</sup>, Caitlin M. Vander Weele<sup>1,5</sup>, Ariella S. Yosafat<sup>1,5</sup>, Evelien H.S. Schut<sup>1,2</sup>, Jeroen P. H. Verharen<sup>1,3</sup>, Suganya Sridharma<sup>1</sup>, Cody A. Siciliano<sup>1</sup>, Ehsan M. Izadmehr<sup>1</sup>, Kathryn M. Farris<sup>1</sup>, Craig P. Wildes<sup>1</sup>, Eyal Y. Kimchi<sup>1,4</sup> and Kay M. Tye<sup>1,6</sup>

10 <sup>1</sup>The Picower Institute for Learning and Memory, Department of Brain and Cognitive Sciences, Massachusetts Institute of Technology,  
11 Cambridge, MA 02139, USA.  
12 <sup>2</sup>Department of Cognitive Neuroscience, Radboud University Medical Center Nijmegen, Nijmegen, The Netherlands  
13 <sup>3</sup>Department of Translational Neuroscience, Brain Center Rudolf Magnus, University Medical Center Utrecht, Utrecht, The Netherlands  
14 <sup>4</sup>Department of Neurology, Massachusetts General Hospital, Boston, MA 02114, USA  
15 <sup>5</sup>These authors contributed equally

16  
17  
18  
19  
20  
21  
22  
23  
24  
25  
26  
27  
28  
29  
30  
31  
32  
33  
34  
35  
36  
37  
38  
39  
40  
41

42 <sup>6</sup>To Whom Correspondence Should be Addressed:  
43 Kay M. Tye, PhD  
44 Picower Institute for Learning and Memory  
45 Department of Brain and Cognitive Sciences  
46 77 Massachusetts Ave, Bldg-Rm 46-6263  
47 Massachusetts Institute of Technology, Cambridge, MA 01239.  
48 [kaytye@mit.edu](mailto:kaytye@mit.edu)

49  
50  
51  
52

53 **Abstract**

54

55 Stress is a risk factor for many neuropsychiatric disorders, and the mesolimbic dopamine (DA)  
56 pathway is a crucial node of vulnerability. Despite the high prevalence of stress-related  
57 neuropsychiatric disorders in women, preclinical knowledge on the impact of stress on neural  
58 circuitry has predominantly been acquired in males. Here, we examine how a non-social stressor  
59 impacts the effect of DA neurotransmission on social and reward-related behaviors in female  
60 mice. Acute stress exposure attenuated the anti-social effects of photoinhibiting ventral tegmental  
61 area (VTA) DA neurons and transformed photoactivation of these cells into an anti-social signal.  
62 Fast-scan cyclic voltammetry (FSCV) revealed an enhancement in optogenetically-induced DA  
63 release after stress. 60 days after stress, mice showed distinct patterns of intra-cranial self-  
64 stimulation of VTA DA neurons. Our results reveal the impact stress exerts on females and show  
65 that neural and behavioral changes induced by acute stress exposure are still present months  
66 later.

67

68

69

## 70 **Introduction**

71 Stressors, or threats to an organism's physical or psychological homeostasis, recruit a  
72 constellation of compensatory processes aimed at mitigating harm (Chrousos, 2009; Gold, 2015).  
73 While these immediate physiological and cognitive responses may be adaptive, stress exposure,  
74 when chronic or severe, can cause long-lasting alterations in brain structure and function, which  
75 can translate into maladaptive behaviors later in life (Chetty et al., 2014; Koenig et al., 2011; Mah  
76 et al., 2016; McEwen et al., 2015; Schneiderman et al., 2005). For example, stress is associated  
77 with a number of negative outcomes experienced in adulthood, including an increased risk in the  
78 development of several neuropsychiatric disorders (e.g., addiction, depression, anxiety, and  
79 schizophrenia) (Mah et al., 2016; Piazza and Le Moal, 1998; Solomon, 2017). Although stress  
80 and mental health disorders appear to be consistently linked, the effects of stress on subsequent  
81 disease-relevant behaviors have been distressingly understudied in females (Goel and Bale,  
82 2009).

83         Considerable evidence suggests that the neurochemical basis of many neuropsychiatric  
84 disease states involves a disruption of dopamine (DA) signaling (Nestler and Carlezon, 2006;  
85 Piazza and Le Moal, 1996; Russo and Nestler, 2013). While the mesolimbic DA system is  
86 historically thought to underlie appetitive motivation and reward-related processes (Schultz, 1998;  
87 Wightman and Robinson, 2002; Wise, 2008), there is a growing body of evidence for DA  
88 involvement in both acute and prolonged stress responses (Imperato et al. 1992; Di Chiara,  
89 Loddo, and Tanda 1999; Saal et al. 2003; Campi et al. 2014; See (Holly and Miczek, 2016) for  
90 extensive review of the current literature). For example, several studies have reported enhanced  
91 DA neurotransmission during or immediately following stress exposure (Abercrombie et al., 1989;  
92 Badrinarayan et al., 2012; Imperato et al., 1992; Mantz et al., 1989; Thierry et al., 1976; Tidey  
93 and Miczek, 1996), and prior stress experience potentiates evoked DA release in response to  
94 subsequent stress or electrical stimulation (Di Chiara et al., 1999; Yorgason et al., 2013, 2016).  
95 Further, stress exposure also increases drug abuse vulnerability, drug seeking, and relapse  
96 following abstinence (Dube et al., 2003; Koob and Volkow, 2016; Shaham et al., 2003; Sinha,  
97 2008; Yorgason et al., 2016), and it is hypothesized that stress sensitizes the mesolimbic  
98 dopaminergic system, thereby potentiating the rewarding properties of drugs of abuse (Johnston  
99 et al., 2016; Lemos et al., 2012; Piazza and Le Moal, 1998; Saal et al., 2003). Despite this rich  
100 literature, it is yet unknown how the stress-induced changes in DA signaling can alter disease-  
101 relevant behaviors at different points in time following an acute stress exposure.

102         The effects of stress on DA and DA-modulated behaviors have been well characterized in  
103 the male rodent brain (Cao et al., 2010; Chaudhury et al., 2013; Tye et al., 2013; Valenti et al.,

104 2012; Yorgason et al., 2013, 2016). However, there is limited knowledge of how stress affects the  
105 female brain, despite evidence that sex strongly influences an individual's response to  
106 environmental challenges (Cahill, 2006; Gruene et al., 2015; Taylor et al., 2000; Trainor, 2011).  
107 Considering females exhibit higher sensitivity to stress (Carpenter et al., 2017; Dalla et al., 2005;  
108 Handa et al., 1994; Lin et al., 2008), a higher prevalence for mood disorders (Bale and Epperson,  
109 2015; Bangasser and Valentino, 2014; Bangasser and Wicks, 2017; Kessler, 2003), and  
110 addiction-relevant behavior (Anker and Carroll, 2011; Calipari et al., 2017), it appears that this  
111 understudied population is particularly at risk for maladaptive, stress-induced physiological and  
112 behavioral alterations. Nonetheless, few studies have examined the basic characteristics of DA  
113 signaling in females, and even fewer have also examined its interaction with stress (Campi et al.,  
114 2014; Holly et al., 2012; Shimamoto et al., 2015; Trainor, 2011).

115 Impairments in social behavior represent a hallmark feature in a number of  
116 neuropsychiatric diseases, including depression, anxiety and schizophrenia. Although many  
117 factors contribute to the development of mood disorders, as stated above, stress can trigger the  
118 onset and increase the risk for the development of these disorders (Mah et al., 2016; Piazza and  
119 Le Moal, 1998; Solomon, 2017). Stress, especially when chronic, can reduce social motivation  
120 and interactions in a variety of tests (Sandi and Haller, 2015), however a challenge is that many  
121 of the studies examining the effects of stress on social behavior use a social defeat stressor (Cao  
122 et al., 2010; Chaudhury et al., 2013; Krishnan et al., 2007), leaving the question of whether non-  
123 social stressors can alter social behavior unanswered.

124 In this study, we demonstrate long-lasting changes in DA-modulation of social interaction,  
125 and provide the first *in vivo* characterization of phasic DA release, following non-social stress in  
126 female mice. We further investigated the consequences of these stress-induced alterations on  
127 reward- and anxiety-related behaviors.

128

## 129 **Results**

130

### 131 **5-day forced swim stress alters the effect of VTA DA neuron inhibition on social interaction**

132 To determine whether stress changes the influence of DA neuron inhibition on social  
133 interaction, female tyrosine hydroxylase (TH)::Cre mice underwent a 5-day forced swim stress  
134 exposure either 7 days before testing ("recent stress") or ~60 days before testing ("remote stress")  
135 in adulthood (mice were ~P97-99 during behavioral testing; Figure 1A-B). To enable  
136 photoinhibition of VTA DA neurons, we injected an adeno-associated viral (AAV) vector carrying  
137 a double-inverted open reading frame (DIO) construct allowing for cre-dependent expression of

138 Halorhodopsin (eNpHR3.0) fused to enhanced yellow fluorescent protein (eYFP) and implanted  
139 an optical fiber above the VTA (Figure 1C and Figure 1-figure supplement 1A-C).

140 To assay social behavior, mice were tested on a 2-day social interaction paradigm. Here,  
141 an unfamiliar young female was introduced into the cage of the experimental mouse and VTA DA  
142 neuron activity was inhibited in the experimental mouse during one testing session  
143 (counterbalanced for order) (Figure 1D). Consistent with previous reports (Gunaydin et al 2014)  
144 photoinhibition of VTA DA neurons reduced social interaction times in non-stressed controls  
145 (Figure 1 E-G). However, photoinhibition after recent and remote stress exposure did not induce  
146 the same decrease in social interaction (Figure 1E-G). We also replicated a subset of these  
147 experiments in dopamine transporter (DAT)::Cre mice (Figure 1F inset and Figure1-figure  
148 supplement 1C-D). To test whether optically-induced changes in social interaction following stress  
149 are restricted to the social realm or are more generalizable, mice were also tested in a novel  
150 object assay (Figure 1H). While stress experience recently increased novel object exploration  
151 relative to non-stress mice, VTA DA photostimulation did not alter novel object exploration in any  
152 group (Figure 1I-K). Other behaviors executed during social interaction and novel object  
153 exploration, e.g. digging and rearing, remained unaltered by both photostimulation as well as  
154 stress exposure (Figure 1-Figure supplement 1E-F).

155 To determine whether other factors, such as general anxiety level or locomotor alterations,  
156 contributed to the reduction in social interaction behavior, we also tested mice in the elevated plus  
157 maze as well as an open field assay (Calhoon and Tye, 2015; Carola et al., 2002; Pellow et al.,  
158 1985). We did not detect differences between the effect of photoinhibition nor stress exposure  
159 on anxiety-related behaviors (Figure 1-figure supplement 1G) and locomotion (Figure 1-figure  
160 supplement 1H-I) did not produce detectable differences between stress exposures and  
161 photostimulation.

162

### 163 **Following stress, photostimulation of VTA DA neurons becomes an anti-social signal**

164 A new cohort of TH::Cre female mice was injected with AAV-DIO-ChR2-eYFP and an optic fiber  
165 was positioned over the VTA (a subset of these experiments were replicated in DAT::Cre mice  
166 Figure 2-figure supplement 1A-D). Stress exposure did not affect baseline social interaction levels  
167 and phasic photostimulation of VTA DA neurons in non-stressed females did not significantly alter  
168 social interaction time (Figure 2A-C). However, photostimulation significantly reduced interaction  
169 time in both recently- and remotely-stressed mice (Figure 2A-C), demonstrating a long-lasting,  
170 stress-induced impact. The stress-induced changes of dopaminergic activation on behavior were  
171 specific to social interaction, as photoactivation did again not modulate the effects of stress

172 exposure on novel object exploration (Figure 2D-F), digging and rearing behaviors (Figure 2-  
173 figure supplement 1E-F, anxiety-related behaviors (Figure 2-figure supplement 2G), or locomotion  
174 (Figure 2-figure supplement 2H-I). Recent stress exposure did, however, increase novel object  
175 exploration in recently stressed mice relative to non-stressed mice, independent of photoinhibition  
176 (Figure 2D).

177         Importantly, dynamic changes during adolescence that influence fear extinction have been  
178 reported (Pattwell et al., 2012). We next investigated whether the differences in the remote stress  
179 group were related to the duration of time between stress exposure and testing or the  
180 developmental stage during initial stress exposure. Thus, we included another group of mice  
181 wherein the initial stress exposure was delivered in adulthood rather than adolescence, and kept  
182 the duration of 60 days constant. We found that there was no difference between groups wherein  
183 the stress exposure period was delivered during adolescence (P28-32) and adulthood (P86-90;  
184 Figure 2-figure Supplement 2J). Although we did not experimentally deliver stress to the age-  
185 matched controls (adulthood, non-stress group) we cannot rule out the possibility that there was  
186 accumulation of stress across the lifetime of these animals.

187

### 188 **DA receptor signaling in the NAc is necessary for VTA DA-mediated anti-social effects in** 189 **stressed mice**

190 To verify whether DA transmission within the NAc is required to mediate the effects of VTA  
191 photostimulation on social interaction, we bilaterally infused a D1-type and D2-type DA receptor  
192 antagonist cocktail in the NAc prior to photostimulation (Figure 3A and Figure 3-figure supplement  
193 1A-B). DA receptor blockade in the NAc attenuated the light-induced anti-social effects observed  
194 after stress exposure (Figure 3B-C). These findings are consistent with our hypothesis that DA  
195 transmission from the VTA to the NAc is necessary to induce the changes seen in social  
196 interaction upon light stimulation. Although we observed a significant increase of locomotion upon  
197 light stimulation in our vehicle-treated mice (Figure 3D), this was not correlated with light-induced  
198 changes in social interaction (Figure 3E). Likewise, no correlation was observed between  
199 changes in locomotion ( $\Delta$  locomotion) and changes in social interaction ( $\Delta$  social) in drug-treated  
200 females (Figure 3F). Thus changes observed in locomotion do not appear to modulate the  
201 changes observed in social interaction behavior.

202

### 203 **Stress facilitates optically-induced DA-release in NAc over prolonged periods of time**

204 To investigate possible long-term alterations in DA neurotransmission due to stress exposure, we  
205 performed *in vivo* fast-scan cyclic voltammetry (FSCV) to monitor DA release within the NAc

206 evoked by optical stimulation of VTA DA neurons (Figure 4A and Figure 4-figure supplement 1A-  
207 B). Optical stimulation (8 pulses at 30 Hz, 5 ms pulses, 20 mW of 473 nm laser light) of VTA DA  
208 neurons induced greater extracellular DA ([DA]) release in the NAc of both recently and remotely  
209 stressed mice, compared to non-stressed controls (Figure 4B-D). DA reuptake, measured as tau,  
210 was not effected in any of the treatment groups (Figure 4E) and was independent of peak release  
211 (Figure 4F). With higher intensity photostimulation (90 pulses at 30 Hz, 5 ms pulses, 20 mW of  
212 473 nm laser light) a similar pattern of DA release differences between groups was observed  
213 (Figure 4G-I); however again no detectable differences in reuptake were observed (Figure 4J-K).  
214 Importantly, DA release followed the phasic stimulation parameters (8 pulses at 30 Hz, every 5  
215 seconds) used during behavioral experiments (Figure 4-figure supplement 1C).

216 To examine how stress-induced alterations in DA signaling influence the ability of VTA DA  
217 photostimulation to serve as a primary reinforcer (Witten et al., 2011), we assessed the effects of  
218 optically-stimulated DA release on response rate to intracranial self-stimulation (ICSS) of VTA DA  
219 neurons. Interestingly, the remote stress group showed significantly different ICSS performance  
220 relative to the non-stress group, reflected as either increased or decreased nosepoke responding  
221 for photostimulation, depending on the stimulation parameters (Figure 4L-M). Specifically, while  
222 all treatment groups showed robust self-stimulation, remotely-stressed mice made significantly  
223 more nose-poke responses for light-stimulation of 8 pulses at 30Hz for each nosepoke when  
224 compared to non-stressed mice (Figure 4L). In contrast, when nosepokes were paired with 90  
225 pulses at 30 Hz, remotely-stressed mice made significantly fewer nosepoke responses relative to  
226 non-stressed mice (Figure 4M). These data are consistent with the notion that the relationship  
227 between DA and behavior is nonlinear.

228

229

230

231

## 232 Discussion

233 We investigated how 5 days of stress exposure affects optical manipulation of DA cell  
234 bodies residing in the ventral tegmental area (VTA) during social behaviors as well as DA  
235 neurotransmission over prolonged periods of time. Specifically, photoinhibition of VTA DA  
236 neurons during a social interaction assay resulted in an anti-social effect in non-stressed control  
237 females, an effect that was blocked in stressed females. Conversely, prior stress experience  
238 resulted in an anti-social effect during photoactivation of VTA DA neurons, an effect that was  
239 attenuated by intra-NAc DA receptor blockade. Importantly, these effects appear to be specific to  
240 the social domain because VTA DA manipulations did not differentially alter novel object  
241 exploration, general anxiety levels, or locomotion. Further, both remotely and recently stressed  
242 mice exhibited amplified peak DA release in the NAc produced by optical stimulation of VTA DA  
243 neurons *in vivo*. To assess the impact of stress-evoked alterations in DA signaling on reward-  
244 relevant behaviors, we examined how optical activation of VTA DA neurons affects social  
245 interaction and intra-cranial self-stimulation (ICSS). Considering that VTA DA neurons have been  
246 implicated in social reward, our social data alone may suggest that stress attenuates the  
247 reinforcing properties of VTA DA activation. However, remotely stressed individual exhibited  
248 higher ICSS response rates compared to non-stressed controls when stimulated with a low  
249 intensity, but a lower response rate when stimulated with a higher intensity. This suggests that  
250 stress may alter DA-mediated reinforcement in a stimulus-dependent manner.

251 DA neurotransmission regulates motivated behaviors (Wightman and Robinson, 2002).  
252 Phasic DA release in the NAc signals unconditioned reward delivery (Aragona et al., 2008; Day  
253 et al., 2007; Roitman et al., 2008), reward-predictive cues (Roitman et al., 2004) and promotes  
254 reward-seeking (Phillips et al., 2003). As such, we investigated the effects of stress-induced  
255 alterations in phasic DA release on reward-related behaviors. We first examined the effects on  
256 social interaction since affiliative social interaction is sex-specific (Bergan et al., 2014; Dulac and  
257 Kimchi, 2007), stress-sensitive, and recruits the mesolimbic DA pathway (Campi et al., 2014;  
258 Chaudhury et al., 2013; Gunaydin et al., 2014; Krishnan et al., 2007; Robinson et al., 2002). Here,  
259 we found that stress produces social avoidance upon phasic VTA DA stimulation in both recently  
260 and remotely stressed females, an effect which relied upon DA receptor activation in the NAc.  
261 Previous work has shown a similar decrease in social interaction after administration of a high  
262 dose of DA-receptor agonist into the NAc of female mice (Campi et al., 2014) as well as a negative  
263 correlation between VTA firing rate and social interaction time in male mice (Cao et al., 2010).  
264 Together with our data this suggests that amplified dopaminergic activity promotes social  
265 avoidance. This theory can be consolidated with our results employing halorhodopsin-induced



266 inhibition of VTA DA neurons during our social interaction task. Here, stress exposure prevented  
267 the social aversion optically triggered under non-stress conditions.

268 Our results go beyond previous literature in several ways, and highlight the exquisite  
269 sensitivity of the female dopaminergic system to stress. Further, our novel non-social stress  
270 paradigm did not significantly alter baseline responses to social interaction. Many studies report  
271 social avoidance after chronic social defeat stress, a model that has great relevance to humans  
272 (Cao et al., 2010; Chaudhury et al., 2013; Krishnan et al., 2007; Trainor et al., 2011). Acute social  
273 isolation produces a rebound of social interaction upon reintroduction to social agents in rats  
274 (Niesink and Van Ree, 1982; Panksepp and Beatty, 1980; Varlinskaya et al., 1999). Consistent  
275 with our results (Figure 1I and Figure 2D), chronic social isolation of rats has produced greater  
276 sensitivity to novelty in addition to changes in dopaminergic function in the NAc (Lapiz et al.,  
277 2003). This study complements existing studies by examining social interaction following an  
278 acute *non-social* stress exposure, tackling a distinct condition with equal relevance to the human  
279 condition. Indeed, our data are consistent with reports that non-social stressors do not affect later  
280 social behavior, while social stressors decrease social behavior (Venzala et al., 2013). The type,  
281 duration and severity of stressors should also be considered, as not all stressors are the same  
282 (Valenti et al., 2012).

283 Our findings demonstrate the nonlinearity of the relationship between dopamine release  
284 and reward-related behavior. As the interval between stress and testing increased, the  
285 enhancement in dopamine release was greater (Figure 4 A-K). However, the relationship  
286 between the interval between stress and testing was dependent on the stimulation parameters,  
287 as remotely stressed animals had increased responding in ICSS for 8 pulses per response, but  
288 decreased responding in ICSS for 90 pulses per response (Figure 4 L and M). We speculate that  
289 these findings have relevance to the striking comorbidity of addiction and neuropsychiatric mood  
290 disorders (Brady and Sinha, 2005; Kessler et al., 1994), both of which are potentiated by stress.  
291 Cocaine users, for example, show diminished emotional engagement, have fewer social contacts,  
292 and have difficulty feeling empathy (Preller et al., 2014). Thus, stress-induced neuroadaptations  
293 in the reward system may alter reward processing such that the motivational value of drug, or in  
294 our case optical stimulation, is enhanced whereas the value of nondrug rewards, such as social  
295 interaction, is reduced (Volkow et al., 2011).

296 Indeed, stress induces similar long-term adaptations within the VTA-NAc pathway as seen  
297 after chronic drug abuse (Nestler 2006; Saal 2003; Ortiz 1996). Likewise, our new 5-day swim  
298 stress appears to induce long-lasting adaptations in the VTA-NAc pathway that sensitizes  
299 individuals to subsequent manipulations of this system and contributes to behavioral

300 abnormalities. It is also interesting to note that the only difference observed between our two  
301 stress groups (recent vs. remote) was intra-cranial self-stimulation response rates for VTA DA  
302 photostimulation. Considering stress-evoked elevations in drug self-administration dissipate  
303 within 24 hours and then re-emerges after a time interval of days to weeks (Haney et al., 1995;  
304 Logrip et al., 2012; Lowery et al., 2008), it is possible that the differential reward sensitivity we  
305 observed between stress groups may result from a similar stress-mediated time course.

306 Our results are consistent with a vast literature showing that stressors alter the mesolimbic  
307 DA pathway and DA-mediated behaviors (Cabib and Puglisi-Allegra, 1996; Cao et al., 2010;  
308 Chaudhury et al., 2013; Di Chiara et al., 1999; Fone and Porkess, 2008; Imperato et al., 1992;  
309 Kalivas and Duffy, 1995; Krishnan et al., 2007; Laman-Maharg and Trainor, 2017; Tidey and  
310 Miczek, 1996; Valenti et al., 2012). For example, animals who experience early life stress exhibit  
311 behavioral hyperactivity in response to DA agonists (Brake et al., 2004; Lovic et al., 2006;  
312 Matthews and Robbins, 2003), suggesting stress induces a hyperdopaminergic state. Indeed,  
313 stress amplifies electrically- and stress-evoked phasic DA release (Brake et al., 2004; Karkhanis  
314 et al., 2016; Yorgason et al., 2013, 2016), but does not alter resting basal DA levels (Di Chiara et  
315 al., 1999; Luine, 2002). However, as previously mentioned, many of these studies were conducted  
316 in male rodents despite clear sex-dependent physiological and behavioral responses to stress  
317 (Gruene et al., 2015; Ter Horst et al., 2009; Trainor, 2011). In contrast to male rodents, females  
318 exhibit enhanced basal DA level in adulthood after early life stress (Afonso et al., 2011;  
319 Shimamoto et al., 2011; Thomas et al., 2009) and show potentiated psychomotor responses to  
320 DA agonists (Thomas et al., 2009). Although other variables (e.g., type, duration, and severity of  
321 the stressor, time since stress experience, etc.) may contribute to the observed differences,  
322 conclusions are difficult to draw given the paucity of literature examining neurochemical changes  
323 in the female brain following stress.

324 Our testing schedule allowed for the assessment of the consequences of recently and  
325 remotely experienced stress. We observed amplification of peak evoked DA release in recently  
326 stressed females. Additionally, our 5-day stressor experienced remotely evoked a remarkably  
327 similar pattern of DA neurotransmission dynamics in females as ~50 days of social isolation in  
328 males (Yorgason et al., 2016). Our data indicate that even a relatively short stressor can produce  
329 profound and long-lasting changes in the female DA system. While several studies report  
330 enhanced DA neurotransmission in males during or immediately following various stressors  
331 (Abercrombie et al., 1989; Di Chiara et al., 1999; Imperato et al., 1992; Saal et al., 2003; Tidey  
332 and Miczek, 1996), the long-term consequences we observed in females after several days of  
333 forced swim stress has not been observed in males (Lemos et al., 2012).

334           When taken together with previous work (Duchesne et al., 2009; Lemos et al., 2012), our  
335 data suggest that the female mesolimbic DA pathway may be more sensitive to stress, and may  
336 therefore exhibit stress-induced DA alterations that do not lead to behavioral impairments in  
337 males. While this is tempting to speculate in the light of female vulnerability to neuropsychiatric  
338 disorders (e.g., anxiety, depression, and addiction) (Kessler, 2003; Kessler et al., 1994), there are  
339 several differences in key variables between these studies (stressor type, duration, and the  
340 neurochemical recording preparation). Future studies should investigate stress-induced DA  
341 neurotransmission patterns in identical experimental conditions in both sexes.

342           In addition to the careful consideration of experimental conditions, we also wish to  
343 emphasize the heterogeneity of the dopaminergic system. For example, acute social isolation  
344 increases subsequent social interaction and potentiates dorsal raphe nucleus DA neurons  
345 (Matthews et al., 2016), which points to the heterogeneity of the DA system. Even within the VTA,  
346 there is substantial heterogeneity in the function of DA neurons (Lammel et al., 2011, 2012).  
347 Another caveat is that not all transgenic mouse lines show the same expression patterns, which  
348 is why we included both TH::Cre and DAT::Cre mouse lines, which show distinct expression  
349 patterns in the VTA (Lammel et al., 2015; Stuber et al., 2015).

350           In summary, we find that stress experience can produce long-lasting alterations in the  
351 mesolimbic DA system and promote behavioral adaptations revealed upon stimulation of this  
352 system in females. Although stress-induced circuit adaptations were often not visible at baseline,  
353 their effects became unmasked when the system was pushed to its limits. This fits with a model  
354 adapted from Shansky and Lipps (Shansky and Lipps, 2013) wherein an optimal level of DA  
355 neuron activity promotes social interaction whereas both sub- and supra-optimal levels of DA  
356 neurotransmission would reduce social interaction (Arnsten, 1997, 2009; Yerkes and Dodson,  
357 1908). These findings highlight the sensitivity of the female DA system to stress and could have  
358 relevance for this population's increased susceptibility for neuropsychiatric disorders and  
359 addiction.

360

## 361 **Material and Methods**

362

### 363 **Animals**

364 Female heterozygous tyrosine hydroxylase (TH)::IRES-Cre transgenic mice were used for all ex-  
365 periments. A subset of experiments was repeated in female heterozygous dopamine transporter  
366 (DAT)::Cre transgenic mice. At ~P21 all mice were transported from the breeding facility to the  
367 experimental facility and were housed on a reverse 12 hour light/dark cycle with food and water  
368 *ad libitum* for the rest of the experimental timeline. All mice were group-housed in pairs of 2-5.  
369 Mice were randomly assigned to an exposure group (non-stress, recent stress, or remote stress)  
370 and mice housed together were always subjected to the same exposure. Remote stress was  
371 performed between P28 and P32 and recent stress between P86 and P90. Behavioral testing  
372 occurred around P97 (Figure 1A). An additional subgroup of females (n=10) were exposed to  
373 adult remote stress between P86-P90. Those mice were then tested around P155 together with  
374 a small cohort of non-stressed mice (n=8). All mice were naïve before any experimental proce-  
375 dure. No animals were reused from other studies. All experimental protocols were approved by  
376 the MIT Institutional Animal Care and Use Committee in accordance with National Institutes of  
377 Health guidelines.

378

### 379 **Stereotaxic virus injection and optical fiber implantation**

380 Mice (~ 8-9 weeks of age) were anesthetized with isoflurane (5% for induction, 1.5-2% after) and  
381 placed in a stereotaxic frame on a heat pad. A 10 $\mu$ l Nanofil syringe with a 33 gauge beveled  
382 microinjection needle was used to infuse virus with a microsyringe pump and its controller. Virus  
383 was infused at a rate of 100 nl per min. Following infusion, the needle was raised 50  $\mu$ m and then  
384 kept in place for an additional 10 min before being slowly withdrawn. All stereotaxic coordinates  
385 are relative to bregma. For photoactivation, voltammetry and pharmacological experiments, mice  
386 were unilaterally injected at two sites in the VTA (-3.2 to -3.25 mm anteroposterior (AP); 0.35 mm  
387 mediolateral (ML); -4.25 and -4.1 mm dorsoventral (DV)) with a total of 1.4  $\mu$ l of virus (AAV<sub>5</sub>-EF1a-  
388 DIO-ChR2(H134R)-eYFP; UNC Viral Core; Chapel Hill, NC). An optical fiber (200-300 $\mu$ m core,  
389 0.22-0.37 numerical aperture [NA], Thorlabs, Newton, NJ, USA) was unilaterally implanted over  
390 the ventral tegmental area (VTA; -3.25 mm AP; 0.35 mm ML and -3.75 mm DV) and secured to  
391 the skull using a base layer of adhesive dental cement (C&B Metabond; Parkell, Edgewood, NY)  
392 followed by a second layer of cranioplastic cement (Ortho-Jet; Lang Dental, Wheeling, IL). For  
393 photoinhibition experiments the same amount of virus (AAV<sub>5</sub>-EF1a-DIO-eNpHR3.0-eYFP; UNC  
394 Viral Core; Chapel Hill, NC), was injected at two sites in the VTA (-3.25 mm AP; 0.00 to 0.015

395 mm ML; -4.25 and -4.1 mm DV). The optical fiber was positioned between the 2 hemispheres  
396 medially above the VTA (-3.25 mm AP; 0.00 mm ML and -2.5 to -3.5 mm DV) and secured in the  
397 same way as above.

398

399 Animals for pharmacological manipulations were, after 4 weeks of viral expression, additionally  
400 implanted with bilateral guide cannulae (5 mm, PlasticsOne, Roanoke, VA) over the nucleus ac-  
401 cumbens (+1.35 mm AP;  $\pm 0.6$  mm ML and -3.0 mm DV). Cannulae were secured in the same  
402 way as above. The incision was closed with sutures and mice were given a subcutaneous injec-  
403 tion of Meloxicam (1.5mg/kg) and saline (~1 ml) prior to recovery under a heat lamp. All behavioral  
404 experiments were conducted 4-6 weeks after surgery.

405

#### 406 **Swim stress**

407 We intensified a modified forced swim stress paradigm previously shown to produce escalating  
408 immobility across sessions indicative of intensified expression of behavioral despair (Porsolt  
409 1977; McLaughlin et al 2003, Bruchas et al 2007) and modulated responses in the dopaminergic  
410 system (Lemos et al 2012). Mice in the recent and remote stress group were subjected to 5 day  
411 swim stress in which they were exposed to a 15 min swim session on day 1, 3, and 5 and four  
412 swim sessions of 6 min each separated by 6 min of rest on day 2 and 4 (Figure1B). Water tem-  
413 perature was maintained at  $24 \pm 1$  °C. After removal from water, mice were returned to their  
414 homecage and allowed to recover under a heat lamp for 30 min. 6 mice in the recent stress group  
415 underwent a 2 day forced swim stress instead of the described 5 days. Difference score values  
416 of these animals were not significantly different and all mice were pooled into the recent stress  
417 group subsequently.

418

#### 419 **Fast-Scan-Cyclic Voltammetry (FSCV)**

420 TH::Cre mice, which had received an injection of AAV<sub>5</sub>-EF1a-DIO-ChR2(H134R)-eYFP in the  
421 VTA, as described above, were given at least 4 weeks for viral expression before recording  
422 experiments. Each carbon-fiber electrode used was pre-calibrated in known concentrations of DA  
423 (250 nM, 500 nM, and 1  $\mu$ M) in flowing artificial cerebral spinal fluid. Calibration data were used  
424 to convert *in vivo* signals to changes in DA concentration using chemometric, principal component  
425 regression, and residual analyses (Badrinarayan et al., 2012) using a custom LabView program  
426 (provided by R. Keithley). Anesthetized *in vivo* FSCV experiments were conducted similar to those  
427 previously described (Matthews, 2016; Nieh et al., 2016). Briefly, mice were anesthetized with  
428 urethane (1.5 g/kg; IP) and placed in a stereotaxic frame. Craniotomies were performed above

429 the NAc (+1.4 mm AP; 0.7 mm ML), VTA (-3.25 mm AP; 0.35 mm ML), and contralateral cortex.  
430 An Ag/AgCl reference electrode was implanted in the contralateral cortex and a 300  $\mu\text{m}$  optical  
431 fiber was implanted above the VTA (-3.75 mm DV). Both implants were then secured to the skull  
432 with adhesive cement (C&B Metabond; Parkell, NY, USA). A glass-encased carbon fiber  
433 electrode ( $\sim 120 \mu\text{m}$  in length, epoxied seal) was lowered into the NAc (DV: -2.8 mm from brain  
434 surface) for electrochemical recordings. Electrodes were allowed to equilibrate for 20 min at 60  
435 Hz and 10 min at 10 Hz. Voltammetric recordings were collected at 10 Hz by applying a triangular  
436 waveform (-0.4 V to +1.3 V to -0.4 V, 400 V/s) to the carbon-fiber electrode versus the Ag/AgCl  
437 reference. Electrodes were lowered in 200  $\mu\text{m}$  steps until a change in current  $>1.0 \text{ nA}$  (minimum  
438 criteria for recording) was evoked by optical stimulation of the VTA using 8 or 90 pulses of 473  
439 nm light (20 mW, 5 ms pulse duration) at 30 Hz, delivered via a DPSS laser and controlled using  
440 a Master-8 pulse generator. Data were collected using Tarheel CV (Chapel Hill, NC, USA) in 60s  
441 files with the stimulation (8 p or 90 p) onset occurring 5 s into the file. Files were collected with a  
442 60 s inter-recording interval and background subtracted at the lowest current value prior to  
443 stimulation onset. Light-evoked signals maintained characteristic cyclic voltammograms for DA,  
444 with oxidation and reduction peaks at  $\sim +0.65 \text{ V}$  and  $\sim -0.2 \text{ V}$ , respectively. In order to sample DA  
445 release in several subregions of the NAc, 1-3 recordings locations (separated by  $>200 \mu\text{m}$ ) were  
446 acquired per mouse within the same DV track. Locations which supported less than 1.0 nA of  
447 optically evoked change in current were discarded.  
448 Following recordings, mice were transcardially perfused with 4% PFA and processed using im-  
449 munohistochemical techniques (described below). Evoked DA release was quantified by calcu-  
450 lating the peak evoked release and area under the curve (10 s starting at stimulation onset; i.e.,  
451 5-15 s) for each recording. The time constant  $\tau$  was defined as the time to clear two-thirds of  
452 the evoked DA signal and was used as a measure of DA reuptake. 2 recordings sites from remote  
453 stress mice were excluded from reuptake analysis, due to no baseline return. Data were analyzed  
454 using a custom LabView program (provided by R. Keithley) and Demon Voltammetry and Analysis  
455 software (Wake Forest University).

## 456 **Behavioral assays**

457 All behavioral tests were performed at least 4 weeks following viral injection to allow sufficient  
458 time for transgene expression. Mice were tested during the dark phase and allowed to acclimate  
459 to the behavioral testing room for at least 1 h prior to testing. Mice were handled and connected  
460 to an optical patch cable for at least 3 days before being subjected to any behavioral assay. All

461 behavioral tests were recorded by a video camera located directly above the respective arena.  
462 The EthoVision XT video tracking system (Noldus, Wageningen, Netherlands) was used to track  
463 mouse location, velocity, and movement of head, body, and tail. All measurements displayed are  
464 relative to the center of the mouse body.

465 Social Interaction assay: Social Interaction in the homecage was examined as previously de-  
466 scribed (Felix-Ortiz and Tye, 2014; Felix-Ortiz et al., 2016; Gunaydin et al., 2014). All cagemates  
467 were temporarily moved to a holding cage and the experimental mouse was allowed to explore  
468 its homecage freely for 1 min (habituation). A novel young (3-5 weeks of age) female C57BL/6  
469 mouse was then introduced into the cage and the two mice were then allowed to interact freely  
470 for 3 min (test session). Each experimental mouse underwent two social interaction tests sepa-  
471 rated by 24 hours, with one intruder paired with optical stimulation and a different one with no  
472 stimulation. Groups were counterbalanced for order of light stimulation. All behaviors were video  
473 recorded and analyzed by 2 experimenters blind to the testing condition using ODLog software  
474 (Macropod software). Individual results were then averaged. The overall score of social interaction  
475 was defined as any period of time in which the experimental mouse was actively investigating the  
476 intruder, including behaviors such as face or body sniffing, anogenital sniffing, direct contact, and  
477 close following (<1 cm). Nonsocial behaviors were also represented in an overall exploration  
478 score, which included cage exploration, rearing, digging, and self-grooming. Animals that had a  
479 social interaction score of less than 5 s were excluded from further analysis.

480 Novel object exploration: The novel object test was performed exactly like the social interaction  
481 assay. Instead of a young intruder, either a figurine or an equivalently sized Lego figure was  
482 introduced to the mouse's homecage and total time spent investigating the object over 3 min was  
483 quantified. Objects were thoroughly cleaned with 70% ethanol in between tests. Each experi-  
484 mental mouse underwent two novel object investigation tests separated by 24 hours, with one  
485 trial paired with optical stimulation and one with no stimulation, counterbalanced for order of light  
486 stimulation and object.

487 Elevated plus maze assay: The elevated plus maze was made of grey plastic and consisted of  
488 two open arms (30 x 5 cm) and two enclosed arms (30 x 5 x 30 cm) extending from a central  
489 platform (5 x 5 cm). The maze was elevated 75 cm from the floor. Individual mice were connected  
490 to the patch cable and allowed 2 min on the lid of the homecage for recovery from handling before  
491 the 10 min session was initiated. Each session was divided into two 5 min epochs with only the  
492 second epoch with light stimulation.

493 Open field test: Individual mice were connected to the patch cable and placed in the center of the  
494 open field (53 x 53 cm) at the start of the session. The open field test consisted of a 10 min session

495 with two 5 min epochs in which the mouse was permitted to freely investigate the chamber. Stim-  
496 ulation was given only during the second epoch.

497 Intracranial self-stimulation: A subset of mice was food restricted for 14-18 h prior to testing to  
498 facilitate behavioral responding. Immediately before the start of the session, mice were connected  
499 to a patch cord and placed in standard Med-Associates (St. Albans, VT, USA) operant chambers  
500 equipped with an active and inactive nose-poke directly below two cue lights as well as audio  
501 stimulus generators and video cameras. A 1 hour optical self-stimulation session began with the  
502 onset of low volume white noise and illumination of both nose pokes. Each active nose poke  
503 performed by the mouse resulted in optical stimulation of VTA cell bodies (either 8 or 90 pulses,  
504 30 Hz, 5 ms pulse duration). Concurrently, the cue-light above the respective port was illuminated  
505 and a distinct tone was played (1 kHz and 1.5 kHz counterbalanced), providing a visible and  
506 auditory cue whenever a nosepoke occurred. Both active and inactive nosepoke time-stamp data  
507 were recorded using Med-PC software and analyzed using custom-written MATLAB scripts  
508 (Mathworks; Natick, MA).

509

### 510 **Laser delivery**

511 For optical manipulations during behavioral assays, the laser was first connected to a patch cord  
512 with a pair of FC/PC connectors in each end (Doric; Québec, Canada). This patch cord was con-  
513 nected through a fiber-optic rotary joint (Doric; Québec, Canada), which allows free rotation of the  
514 fiber, with another patch cord with a side of FC/PC connector and a ferrule connection on the  
515 other side that delivers the laser via a chronic optic fiber. Phasic activation of VTA cell bodies  
516 consisted of 30 Hz bursts of eight 5 ms pulses of 473 nm light delivered every 5 sec at a light  
517 power output of 10-20 mW of blue light generated by a 100 mW 473 nm DPSS laser (OEM Laser  
518 Systems; Draper, UT), delivered via an optical fiber. Inhibition of VTA cell bodies was performed  
519 with 593 nm light delivered constantly at a light power output of 1 mW of yellow light, generated  
520 by a 593 nm DPSS laser. Laser output was manipulated with a Master-8 pulse stimulator  
521 (A.M.P.I.; Jerusalem, Israel). Onset of laser light was determined by behavioral hardware.

522

### 523 **Monitoring of estrous cycle**

524 After behavioral testing each day, a vaginal swab was collected using a cotton tipped swab (Pu-  
525 ritan Medical Products Company; LLC Guilford, ME) wetted with saline (Byers et al., 2012). The  
526 cells were spread on a microscope slide. Slides were air dried and stained with 500 $\mu$ l of Accustain  
527 (Accustain, Sigma-Aldrich, St. Louis, MO) for approximately 45 s. Slides were then rinsed with  
528 water, coverslipped, and examined under a light microscope in order to determine the stage of



529 the estrous cycle phase via vaginal cytology. For a subset of mice, unstained vaginal lavage  
530 specimens were used to determine the estrous cycle (Marcondes et al., 2002).

531

### 532 **Pharmacology**

533 D1- (SCH-23390; 3.1 mM, Sigma-Aldrich, St. Louis, MO) and D2- (Raclopride; 2.89 mM, Sigma-  
534 Aldrich, St. Louis, MO) receptor antagonists were dissolved in sterile saline (0.9% NaCl) freshly  
535 each day. ~ 10 minutes before the start of the behavioral assay, 0.4  $\mu$ l of the DA receptor antag-  
536 onist cocktail or vehicle (sterile saline) was infused into the NAc via dual internal infusion needles  
537 connected to a 10  $\mu$ l microsyringe, inserted into the bilateral guide cannula. The flow rate was  
538 kept at 100 nl per min and regulated by a syringe pump (Harvard Apparatus, MA). Infusion nee-  
539 dles were withdrawn 2 min after the infusion had finished. Testing of females took place over 4  
540 consecutive days, each day a mouse only received one drug-light pairing counterbalanced for  
541 order.

542

### 543 **Immunohistochemistry and confocal microscopy**

544 All mice were anesthetized with sodium pentobarbital and then transcardially perfused with ice-  
545 cold phosphate-buffered saline (PBS) followed by 4% paraformaldehyde (PFA) in PBS (pH 7.3).  
546 Extracted brains were post-fixed in 4% PFA overnight and then transferred to 30% sucrose in  
547 PBS until equilibration. 50-60  $\mu$ m-thick coronal sections were sliced using a sliding microtome  
548 (HM430: Thermo Fisher Scientific, Waltham, MA) and stored in PBS at 4°C until processed for  
549 immunohistochemistry. Free-floating sections were blocked for 1 hr at room temperature in Triton  
550 0.3%/PBS and 3% normal donkey serum. Primary antibody (chicken anti-TH 1:1000; AB39702,  
551 Millipore, Temecula, CA) was incubated for 24 hrs at 4°C in Triton 0.3%/PBS and 3% normal  
552 donkey serum. Sections were then washed 4 times for 10 min each with PBS and incubated with  
553 secondary antibody (Cy3 or Alexa-647 donkey anti-chicken 1:1000; 703-605-155 Jackson Imm-  
554 noResearch Laboratories, Inc., West Grove, PA) and a DNA specific fluorescent probe (DAPI:  
555 4',6-Diamidino-2-Phenylindole, 1:50,000) for 2 hrs at room temperature. Sections were washed  
556 again for 4 x 10 min with PBS followed by mounting on microscope slides with PVA-DABCO.  
557 Fluorescence images were acquired using an Olympus FV1000 confocal laser scanning micro-  
558 scope using a 10x/0.40 NA or a 40x/1.30 NA oil-immersion objective. Mice without viral expres-  
559 sion or mistargeted fiber placements were excluded from further analysis.

560

### 561 **Statistics**

562 Sample sizes are based on past experience and similar to those presented in related literature.  
563 There was no predetermined calculation. Statistical analyses were performed using commercial  
564 software (GraphPad Prism, GraphPad Software, Inc, La Jolla, CA; MATLAB, Mathworks, Natick,  
565 MA or SPSS, IBM, Armonk, NY). Group comparisons were made using repeated measures anal-  
566 ysis of variance (ANOVA), including one-, two-, or three-way ANOVAs as indicated. Post-hoc  
567 tests were corrected for multiple comparisons using Dunnett's post-hoc tests to compare means  
568 from experimental stress exposed groups (recent or remote) to non-stressed controls, or using  
569 Sidak's post-hoc tests when appropriate. P-values reported reflect values corrected for the multi-  
570 ple comparisons using these methods. Single variable comparisons were detected with two-tailed  
571 paired or unpaired Student t-tests. Correlations were calculated using Pearson correlations. A  
572 Grubb's test was performed on individual data sets to identify outliers. Significance thresholds are  
573 noted as \* $p \leq 0.1$ , \* $p \leq 0.05$ , \*\* $p \leq 0.01$ , \*\*\* $p \leq 0.001$ . All data are shown as mean  $\pm$  SEM.

574 **Acknowledgments**

575 We thank P. Namburi for sharing custom MATLAB scripts, Erik Douma and the entire Tye  
576 Laboratory for helpful support and discussion. We also thank Jordan T. Yorgason (Oregon Health  
577 and Science University) for providing custom scripts for fast-scan cyclic voltammetry analyses.  
578 K.M.T. is a Picower Institute Faculty Member and New York Stem Cell Foundation - Robertson  
579 Investigator and acknowledges funding from the JPB Foundation, PIF, PNDRF, Whitehall  
580 Foundation, Klingenstein Foundation, NARSAD Young Investigator Award, Alfred P Sloan  
581 Foundation, NIH R01-MH102441-01 (NIMH) and NIH Director's New Investigator Award DP2-  
582 DK-102256-01 (NIDDK). R.W. acknowledges funding from the Simons Center for the Social Brain,  
583 the Netherlands Organization for Scientific Research (NWO) RUBICON fellowship program, and  
584 a NARSAD Young Investigator Grant from the Brain & Behavior Research Foundation. C.M.V.W.  
585 was supported by the NSF Graduate Research Fellowship (NSF GRFP) and the Integrative  
586 Neuronal Systems Training Fellowship (T32 GM007484). A.S.Y., S.S., and K.M.F. were funded  
587 by the Undergraduate Research Opportunities Program at MIT. E.Y.K. is supported by the  
588 Collaborative Clinical Neuroscience Fellowship at the Picower Institute for Learning and Memory.  
589

590 **Author contributions**

591 R.W. and K.M.T. conceived and supervised the study. R.W., C.M.V.W., and K.M.T. contributed  
592 to experimental design. R.W., A.S.Y., E.H.S.S., J.P.H.V., S.S., E.M.I., and K.M.F. executed and  
593 analyzed behavioral experiments. R.W., C.M.V.W., and C.A.S. conducted and analyzed FSCV  
594 recordings. R.W., A.S.Y., E.H.S.S., and C.A.S. performed stereotaxic surgeries. R.W., C.M.V.W.,  
595 A.S.Y., E.H.S.S., J.P.H.V., S.S., E.M.I., K.M.F. performed immunohistochemistry. C.P.W. and  
596 E.Y.K. contributed to data analysis. R.W., C.M.V.W., E.Y.K. and K.M.T. wrote the paper, all  
597 authors contributed to editing the paper. The authors declare no competing financial interest.

598

Wichmann, Vander Weele, Yosafat et al. Figure 1

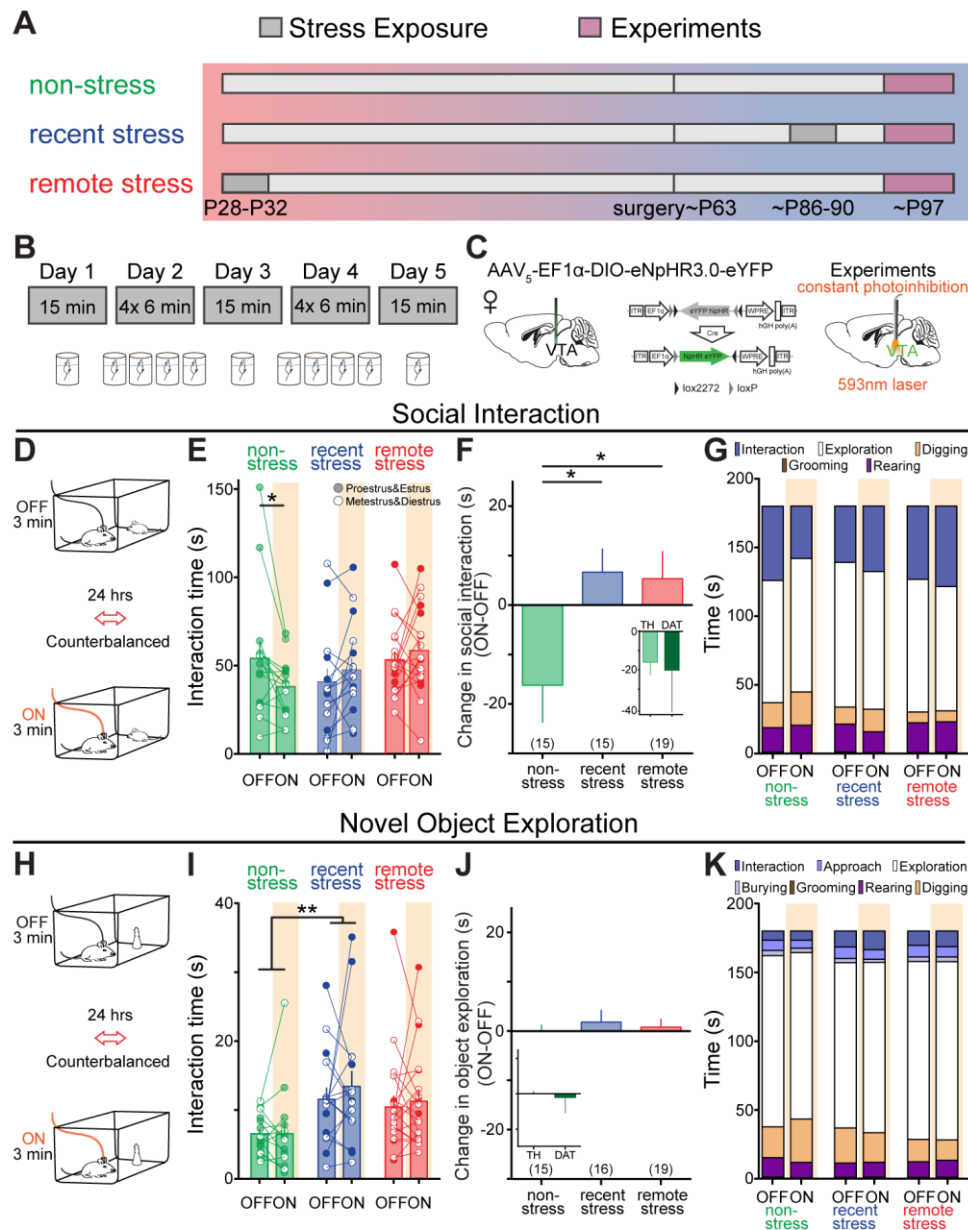

599

600 **Figure 1. Stress attenuates the effects of VTA DA neuron inhibition on social interaction.**

601 (A) Experimental timeline for mice in each exposure group. (B) Schematic of stress exposure  
 602 paradigm, corresponding to grey boxes in (A). (C) VTA DA neurons were transduced with AAV<sub>5</sub>-  
 603 EF1 $\alpha$ -DIO-eNpHR3.0-eYFP and photoinhibited with constant yellow light (593 nm) delivered via  
 604 an optical fiber implanted above the VTA. (D) Schematic of social interaction paradigm. (E)  
 605 Photoinhibition of VTA DA neurons affected social interaction differently depending on prior stress  
 606 exposure. There was a significant interaction of photostimulation and treatment in the social  
 607 interaction assay (Two-way repeated measures ANOVA, main effect of stimulation:  $F_{1,46}=0.159$ ,

608 p=0.692; main effect of stress exposure:  $F_{2,46}=1.278$ ,  $p=0.288$ ; light-by-stress exposure  
609 interaction:  $F_{2,46}=4.581$ ,  $p=0.015$ ; Sidak's post-hoc test; \* $p=0.033$ ). (F) Compared to its effects in  
610 non-stressed mice, photoinhibition of VTA DA neurons was significantly less likely to decrease  
611 social interaction (one-way ANOVA,  $F_{2,46}=4.581$ ,  $p=0.015$ ) in both recently (Dunnett's post-hoc  
612 test; \* $p=0.022$ ) and remotely (\* $p=0.023$ ) stressed mice. Inset: There was no difference in the effect  
613 of photostimulation on social interaction behaviors between non-stressed TH::Cre ( $n=15$ ) and  
614 DAT::Cre ( $n=5$ ) mice (unpaired t-test, two-tailed;  $t_{18}=0.311$ ,  $p=0.759$ ). (G) Breakdown of mean  
615 time spent engaging in social interaction, grooming, rearing, digging and cage exploration  
616 behaviors during the social interaction task, for 3 min light-ON and light-OFF epochs grouped by  
617 stress exposure. (H) Schematic of object exploration paradigm. (I) Novel object exploration was  
618 not affected by photoinhibition (Two-way repeated measures ANOVA, main effect of light:  
619  $F_{1,47}=0.68$ ,  $p=0.413$ ; light-by-stress exposure interaction:  $F_{2,47}=0.22$ ,  $p=0.801$ ), though stress  
620 exposure increased novel object exploration independent of VTA DA neuron photoinhibition (main  
621 effect of stress exposure:  $F_{2,47}=4.5$ ,  $p=0.016$ ) after recent stress exposure (Sidak's post-hoc test,  
622 \*\* $p=0.017$ ). (J) In contrast to social interaction, the effects of photoinhibition on novel object  
623 exploration did not differ between the stress exposure groups (One-way ANOVA,  $F_{2,47}=0.223$ ,  
624  $p=0.801$ ). Inset: There was no difference in the effect of photoinhibition on social interaction  
625 behaviors between non-stressed TH::Cre ( $n=15$ ) and DAT::Cre ( $n=5$ ) mice (unpaired t-test, two-  
626 tailed;  $t_{18}=0.718$ ,  $p=0.482$ ). (K) Breakdown of mean time spent engaging in various behaviors  
627 during the novel object exploration task, including novel object exploration, for 3 min light-ON and  
628 light-OFF epochs, grouped by prior stress exposure. Numbers in brackets indicate number of  
629 mice per group. Error bars indicate  $\pm$ SEM.

630

631

632

633

Wichmann, Vander Weele, Yosafat et al. Figure 2  
Social Interaction

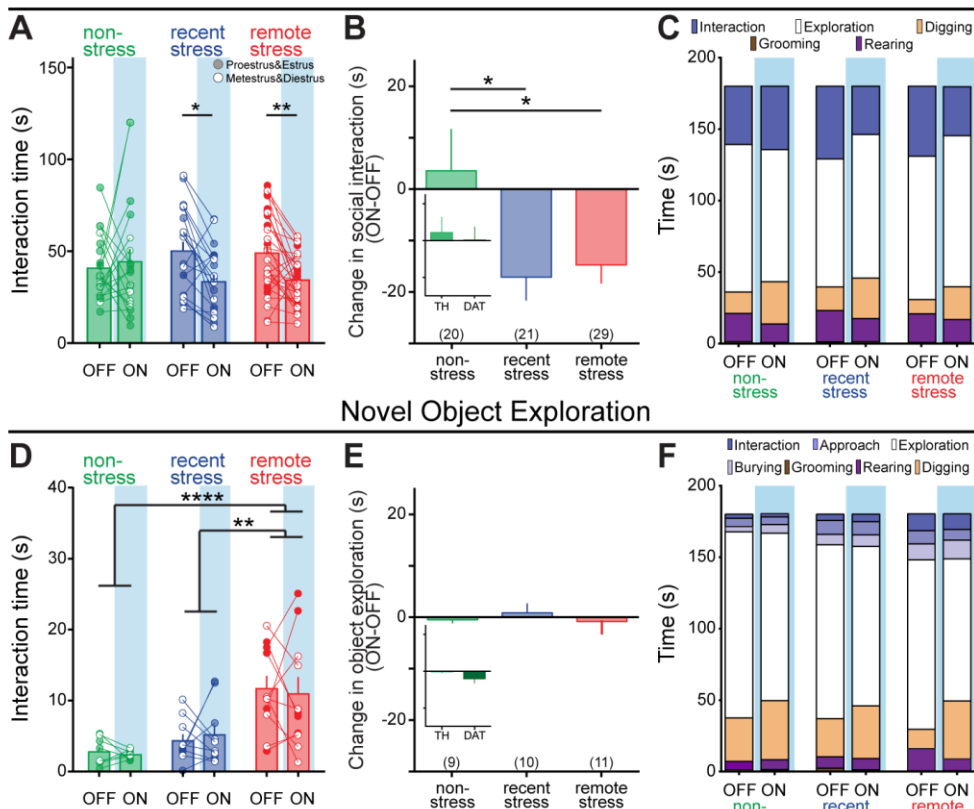

634

635 **Figure 2. Stress turns phasic VTA DA neuron activation into an anti-social signal.**

636 (A) Photoactivation of VTA DA neurons induced a significant effect stimulation and a treatment  
 637 by stimulation interaction effect in the social interaction assay (Two-way repeated measures  
 638 ANOVA, main effect of stimulation:  $F_{1,67}=8.991$ ,  $p=0.004$ ; main effect of stress exposure:  
 639  $F_{2,67}=0.02$ ,  $p=0.981$ ; light-by-stress exposure interaction:  $F_{2,67}=4.041$ ,  $p=0.022$ ). Both recent  
 640 (Sidak's post-hoc test \* $p=0.012$ ) and remote (\*\* $p=0.008$ ) stress mice spend less time interacting  
 641 during the light stimulation (ON) trial compared to the unstimulated (OFF) trial. (B) Compared to  
 642 its effects in non-stressed controls, photoactivation of VTA DA neurons was more likely to  
 643 decrease social interaction in both recently (Dunnett's post-hoc test, \* $p=0.025$ ) and remotely  
 644 (\* $p=0.03$ ) stressed mice. Inset: There was no difference in the effect of photostimulation on social  
 645 interaction behaviors between non-stressed TH::Cre ( $n=20$ ) and DAT::Cre ( $n=8$ ) mice (unpaired  
 646 t-test, two-tailed;  $t_{25}=0.289$ ,  $p=0.775$ ). (C) Breakdown of mean time spent engaging in social  
 647 interaction, grooming, rearing, digging and cage exploration behaviors during the social  
 648 interaction task for 3 min light-ON and light-OFF epochs grouped by stress exposure. (D) In  
 649 contrast to social interaction, novel object exploration was not affected by photoactivation or by

650 the interaction between light and stress exposure (Two-way repeated measures ANOVA, main  
651 effect of light:  $F_{1,27}=0.01$ ,  $p=0.921$ ; interaction of light-by-stress exposure,  $F_{2,27}=0.22$ ,  $p=0.802$ ),  
652 though remote stress exposure significantly increased novel object exploration (main stress  
653 exposure effect:  $F_{2,27}=14$ ,  $p<0.0001$ ) compared to both non-stressed controls (Sidak's post-hoc  
654 test; \*\*\*\* $p<0.0001$ ) and recently stressed mice (\*\* $p=0.002$ ). (E) The effects of photostimulation on  
655 novel object exploration did not differ between the stress exposure groups (one-way ANOVA;  
656  $F_{2,27}=0.222$ ,  $p=0.802$ ). Inset: There was no difference in the effect of photostimulation on novel  
657 object exploration between non-stressed TH::Cre ( $n=9$ ) and DAT::Cre ( $n=8$ ) mice (unpaired t-test,  
658 two-tailed;  $t_{15}=1.572$ ,  $p=0.137$ ). (F) Breakdown of mean time spent engaging in various behaviors  
659 during the novel object exploration task for 3 min light-ON and light-OFF epochs, grouped by prior  
660 stress exposure. Numbers in brackets indicate number of mice per group. Error bars indicate  
661  $\pm$ SEM.

662  
663  
664  
665  
666  
667  
668  
669  
670  
671  
672  
673  
674  
675  
676  
677  
678

Wichmann, Vander Weele, Yosafat et al. Figure 3

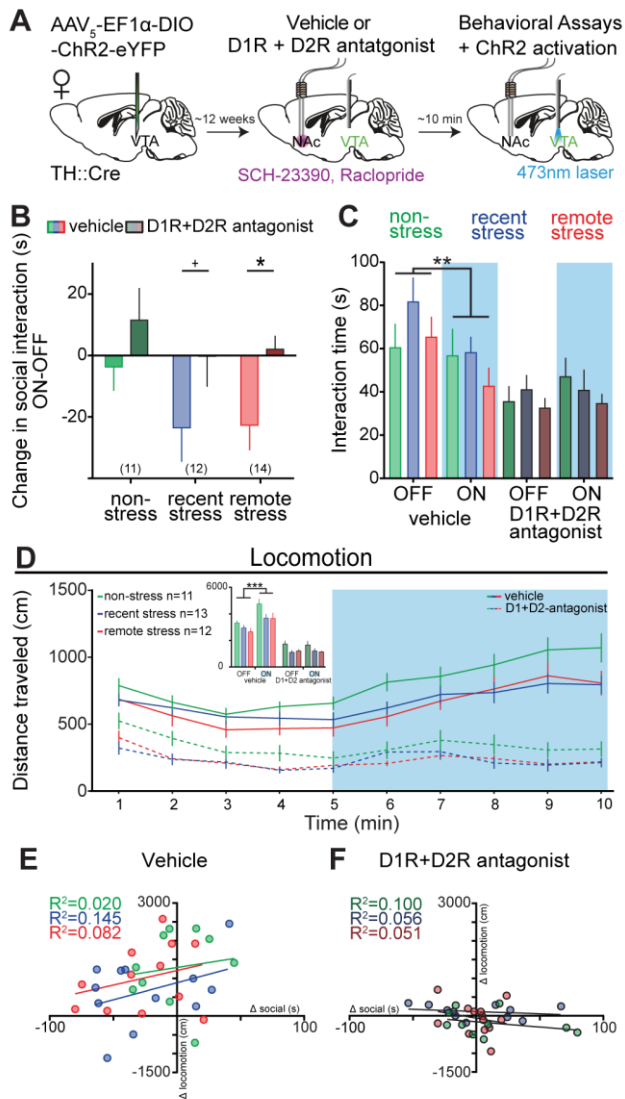

679

680 **Figure 3. Light-induced behavioral effects in stressed mice are blocked by intra-NAc DA-**  
 681 **receptor blockade.**

682 (A) To test the role of dopamine in the effects of VTA photostimulation on social interaction,  
 683 dopamine receptor antagonists (D1R: SCH23390, D2R: Raclopride) or vehicle (saline) were  
 684 bilaterally infused into the NAc approximately 10 minutes prior to social interaction assays. (B)  
 685 The effects of photoactivation were significantly different in the presence of dopaminergic  
 686 antagonists (Two-way repeated measures ANOVA, main effect of drug,  $F_{1,34}=14.78$ ,  $p=0.0005$ ).  
 687 Dopaminergic antagonists attenuated light-induced decreases in social interaction, measured as  
 688 difference scores (ON-OFF), in recently (Sidak's post-hoc test,  $+p=0.06$ ) and remotely ( $*p=0.026$ )  
 689 stressed mice. (C) The effects of photostimulation differed based on infusion of dopaminergic  
 690 antagonists (Three-way repeated measures ANOVA: main effect of drugs:  $F_{1,34}=31.916$ ,



691 p=0.0005; drugs-by-photostimulation interaction  $F_{1,34}=14.782$ ,  $p=0.001$ ). Photostimulation of VTA  
692 DA neurons significantly decreased social behavior after infusion of vehicle (\*\* $p=0.003$ ), but not  
693 after infusion of dopaminergic antagonists ( $p=0.362$ ). (D) Photostimulation as well as drug  
694 administration effected open-field locomotion. A three-way repeated measures ANOVA,  
695 comparing 5 min epochs, revealed a main effect of drug treatment ( $F_{1,30}=117.05$ ,  $p=0.0005$ ),  
696 stress exposure ( $F_{2,30}=4.067$ ,  $p=0.027$ ), and light stimulation ( $F_{1,30}=25.952$ ,  $p=0.0005$ ) as well as  
697 a drug-by-light interaction ( $F_{1,30}=40.780$ ,  $p=0.0005$ ), but no other interactions (drug-by-stress  
698 interaction:  $F_{2,30}=0.284$ ,  $p=0.755$ ; light-by-stress interaction:  $F_{2,30}=0.278$ ,  $p=0.759$ ; drug-by-light-  
699 by-stress interaction:  $F_{2,30}=1.972$ ,  $p=0.157$ ). Upon pairwise comparison we observed that  
700 photostimulation increased locomotion in all vehicle-treated groups (Sidak's post-hoc test;  
701 \*\*\* $p=0.001$ ) however, no difference was detected in the drug-treated groups ( $p=0.999$ ). (E-F)  
702 Photostimulation effects on social interaction ( $\Delta$  social, ON-OFF) did not correlate with  
703 photostimulation effects on locomotion ( $\Delta$  locomotion, ON-OFF) during neither (E) vehicle  
704 treatment (Pearson's correlation: non-stressed:  $r=0.142$ ,  $p=0.697$ ; recently stressed:  $r=0.381$ ,  
705  $p=0.221$ ; remotely stressed:  $r=0.287$ ,  $p=0.366$ ) nor (F) drug treatment (Pearson's correlation: non-  
706 stressed:  $r=-0.317$ ,  $p=0.373$ ; recently stressed:  $r=-0.236$ ,  $p=0.484$ ; remotely stressed:  $r=-0.227$ ,  
707  $p=0.456$ ). Numbers in brackets indicate number of mice per group. Error bars indicate  $\pm$ SEM.

708

Wichmann, Vander Weele, Yosafat et al., Figure 4

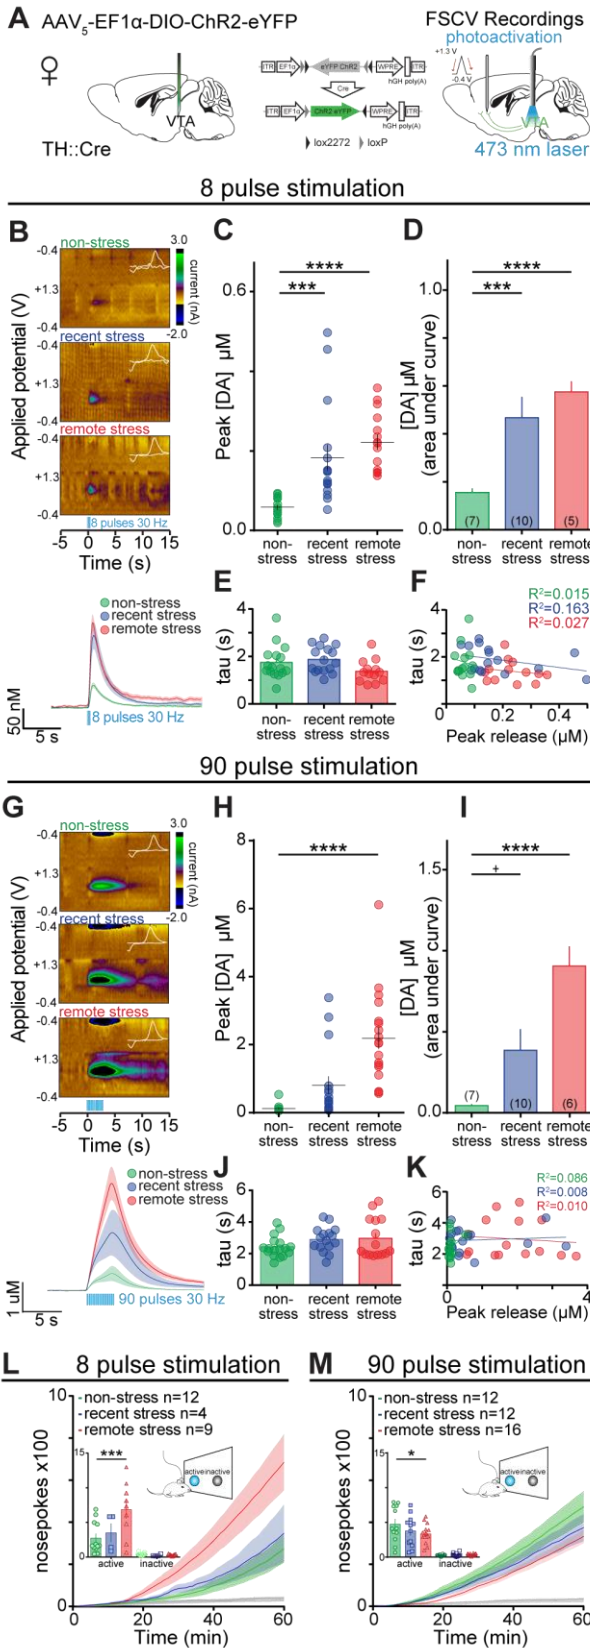

710 **Figure 4. Stress increases optically-induced DA-release in the NAc**

711 (A) VTA DA neurons in TH::Cre female mice were transfected with AAV<sub>5</sub>-EF1 $\alpha$ -DIO-ChR2-eYFP  
712 and photostimulated with blue light (473 nm) delivered via optical fibers implanted above the VTA.  
713 Anesthetized fast-scan cyclic voltammetry (FSCV) recordings were performed in the NAc while  
714 DA release was evoked by photostimulation of VTA DA neurons in non-stressed (n=7 mice, n=16  
715 recording sites), recently stressed (n=10 mice, n=16 recording sites), and remotely stressed (n=5,  
716 n=15 recording sites) mice using blue light (473 nm, 30 Hz, 8 pulses, 20 mW, 5 ms pulse duration)  
717 delivered via an optical fiber to the VTA. (B) Representative color plots suggest that VTA  
718 photostimulation increased current at the oxidation potential for DA in recently and remotely  
719 stressed mice relative to non-stressed mice. Differences between recently and remotely stressed  
720 mice and non-stressed mice became apparent after signal conversion from evoked current to  
721 changes in extracellular DA concentration ([DA]) (lower panel; mean  $\pm$  SEM). (C) The peak [DA]  
722 evoked by optical activation of VTA DA neurons differed based on stress exposure (One-way  
723 ANOVA,  $F_{2,44}=14.66$ ,  $p<0.0001$ ), with significantly greater peak DA concentrations in recently  
724 (Dunnett's post-hoc test; \*\*\* $p=0.0005$ ) and remotely (\*\*\*\* $p<0.0001$ ) stressed mice compared to  
725 non-stressed mice. (D) Quantification of [DA] as area under the curve revealed that light-evoked  
726 DA release also differed based on stress exposure (one-way ANOVA,  $F_{2,44}=14.37$ ,  $p<0.0001$ ) and  
727 was enhanced in recently (Dunnett's post-hoc test, \*\*\* $p=0.0007$ ) and remotely stressed  
728 (\*\*\*\* $p<0.0001$ ) mice. (E) There were no significant differences in the rate of decay, measured as  
729 tau, between groups (one-way ANOVA,  $F_{2,42}=2.724$ ,  $p=0.077$ ). (F) Analysis of the relationship  
730 between tau and peak release for different stress exposures (Pearson's correlation; non-stress:  
731  $r=-0.122$ ,  $p=0.665$ ; recent stress:  $r=-0.3661$ ,  $p=0.163$ ; remote stress:  $r=-0.165$ ,  $p=0.591$ ) showed  
732 no relationship between tau and release. (G) Representative color plots illustrating VTA  
733 photostimulation increased current at the oxidation potential for DA in recently and remotely  
734 stressed mice relative to non-stressed controls using a higher intensity stimulation paradigm (473  
735 nm, 30 Hz, 90 pulses, 20 mW, 5 ms pulse duration). Differences between recently (n=10 mice,  
736 n=16 recording sites) and remotely stressed (n=6 mice, n=18 recording sites) mice and non-  
737 stressed controls (n=6 mice, n=14 recording sites) were also apparent in the average converted,  
738 evoked concentrations of DA (lower panel; mean  $\pm$  SEM). (H) The peak extracellular DA  
739 concentration ([DA]) evoked by optical activation of VTA DA neurons differed based on stress  
740 exposure (one-way ANOVA,  $F_{2,45}=16.82$ ,  $p<0.0001$ ) with significantly greater peak [DA] in  
741 remotely stressed mice compared to non-stressed controls (Dunnett's post-hoc test;  
742 \*\*\*\* $p<0.0001$ ). (I) Quantification of [DA] as area under the curve revealed that light-evoked DA  
743 release differed based on stress exposure (one-way ANOVA,  $F_{2,45}=15.24$ ,  $p<0.0001$ ) and was

744 enhanced in recently (Dunnett's post-hoc test,  $*p=0.077$ ) and remotely stressed mice  
745 ( $****p<0.0001$ ) compared to non-stress controls. (J) There were no significant differences in the  
746 rate of decay, measured as tau, between stress exposure groups (one-way ANOVA,  $F_{2,45}=1.71$ ,  
747  $p=0.192$ ). (K) There were no statistically significant correlations of tau and peak release in any of  
748 the groups (Pearson's correlation; non-stress:  $r=0.294$ ,  $p=0.308$ ; recent stress:  $r=0.091$ ,  $p=0.737$ ;  
749 remote stress:  $r=-0.100$ ,  $p=0.723$ ). (L) All groups showed robust intracranial self-stimulation for  
750 photostimulation (8 pulses, 30Hz, 20mW, 5ms pulse) of VTA DA neurons. Significantly more nose  
751 pokes were performed into the active versus the inactive nose-poke port. Performance differed  
752 based on prior stress exposure (Two-way repeated measures ANOVA; main effect of  
753 active/inactive nose-poke port:  $F_{1,22}=34.62$ ;  $p<0.0001$ ; effect of stress exposure:  $F_{2,22}=4.654$ ,  
754  $p=0.021$  and interaction of nose poke-by-stress exposure:  $F_{2,22}=4.958$ ,  $p=0.017$ ) with the remote  
755 stress group performing more active nose-pokes compared to the non-stress group (Dunnett's  
756 post-hoc test,  $***p=0.0002$ ). (M) All groups additionally showed robust intracranial self-stimulation  
757 for higher intensity photostimulation (90 pulses, 30Hz, 20mW, 5ms pulse) of VTA DA neurons.  
758 Significantly more nose pokes were performed into the active versus the inactive nose-poke port.  
759 Performance differed based on prior stress exposure (Two-way repeated measures ANOVA;  
760 main effect of active/inactive nose-poke port:  $F_{1,37}=127.4$ ;  $p<0.0001$ ; effect of stress exposure:  
761  $F_{2,37}=1.397$ ,  $p=0.26$  and interaction of nose poke-by-stress exposure:  $F_{2,37}=1.99$ ,  $p=0.151$ ) with  
762 the remote stress group performing less active nose-pokes compared to the non-stress group  
763 (Dunnett's post-hoc test,  $*p=0.025$ ). Color plot insets: cyclic voltammograms (CVs). Numbers in  
764 brackets indicate number of mice per group. Error bars indicate  $\pm$ SEM.  
765

766

## Wichmann, Vander Weele, Yosafat et al., Figure 5

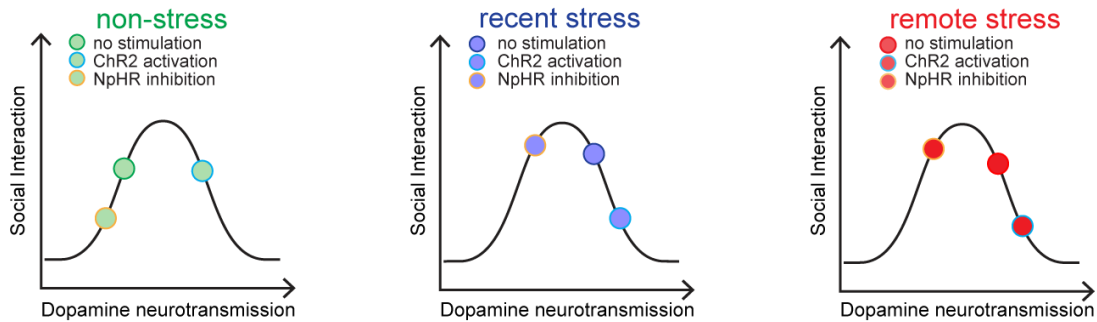

767

768 **Figure 5. Proposed model of interaction between stress, dopamine and social interaction.**

769 An optimal level of DA neuron activity is necessary and promotes social interaction. However,  
770 sub- or supra-optimal levels of DA neurotransmission, induced by photoinhibition (orange-  
771 rimmed circles) or photostimulation (blue-rimmed circles) in this study, causes a reduction in  
772 social interaction.

773

774

775

776

777

778

779

780

781

782

783

Figure 1 - figure supplement 1

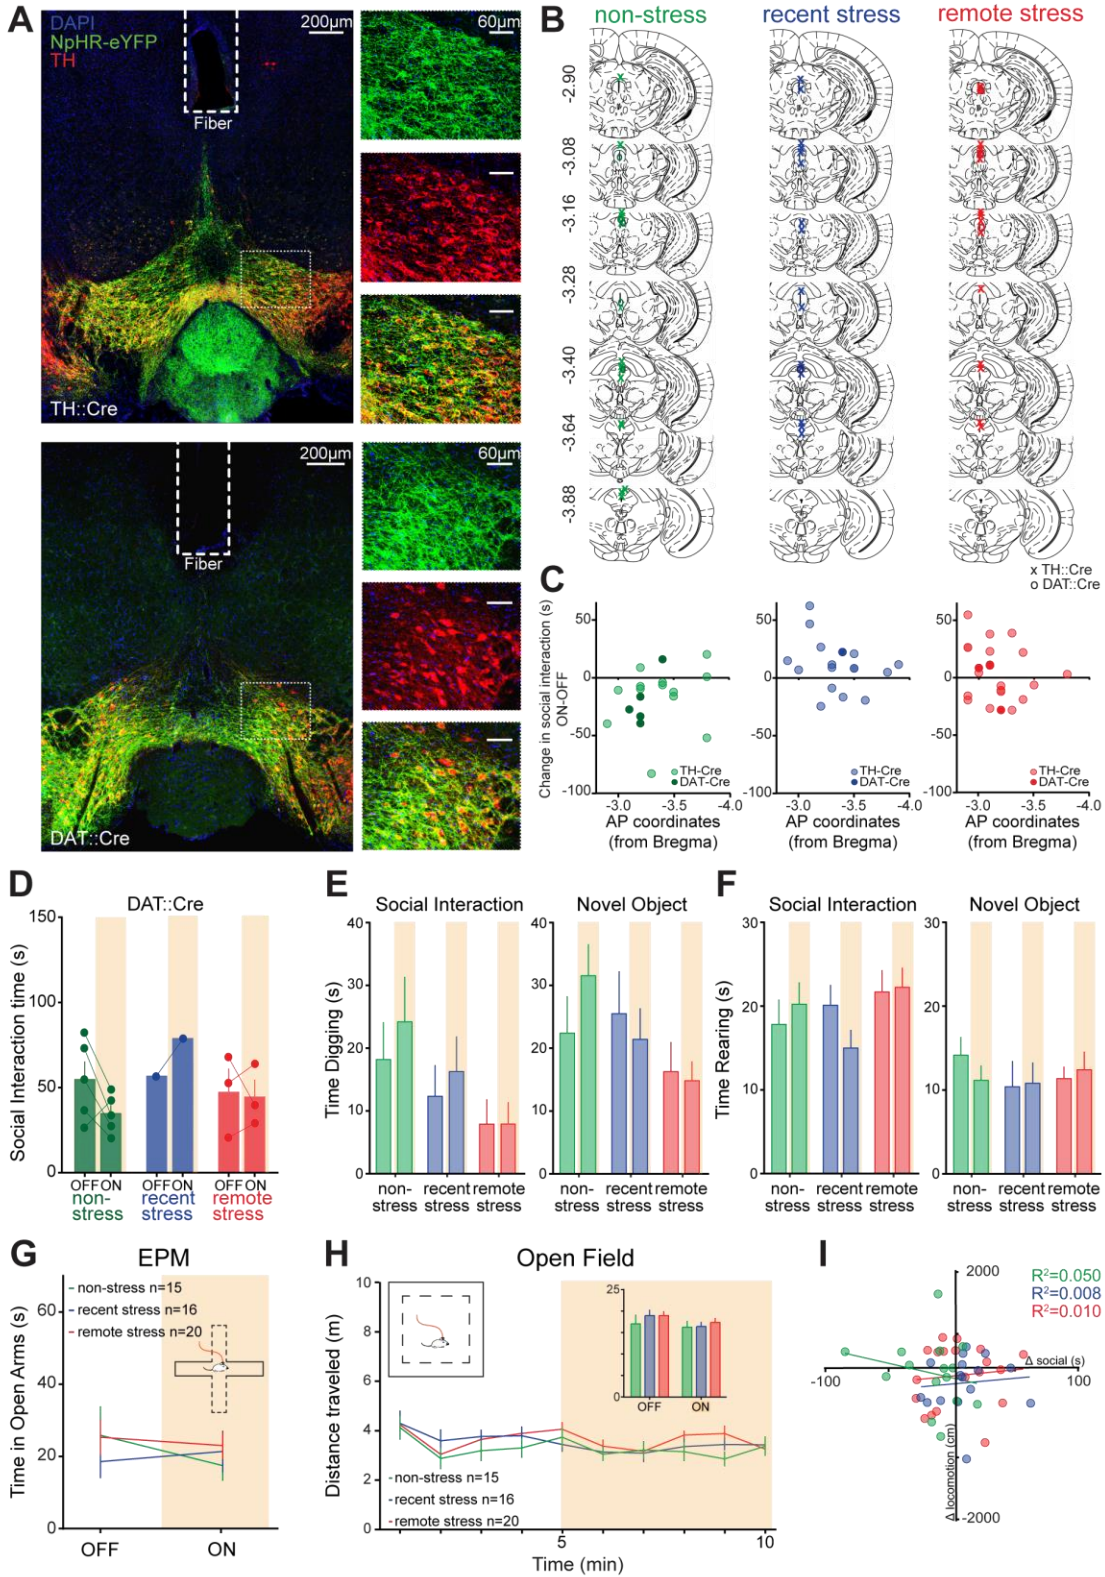

785 **Figure 1 – figure supplement 1**

786 (A) Confocal images of a 50  $\mu\text{m}$  thick coronal section containing the VTA of a TH::Cre female  
787 (upper panels) and a DAT::Cre female (lower panels) injected with AAV<sub>5</sub>-EF1 $\alpha$ -DIO-eNpHR3.0-  
788 eYFP (left). Thinly dotted white square: localization of the magnified images (40x; DAPI in blue;  
789 eNpHR3.0-eYFP in green; TH in red). (B) Histologically verified optical fiber placements for all  
790 subjects included in photoinhibition studies. Symbols represent termination of fiber tract for each  
791 group. (C) Scatter-plot of anterior-posterior (AP) fiber placement, measured from bregma, vs.  
792 social interaction difference scores (ON-OFF) in all mice included in this experiment. There was  
793 no correlation between AP of fiber placement and social interaction in any of the experimental  
794 groups. (D) Effect of photoinhibition of VTA DA neurons in DAT::Cre mice in the social interaction  
795 assay. (E) There was no effect of light stimulation, stress exposure, or an interaction effect on the  
796 time spend digging during either the social interaction (Two-way repeated measures ANOVA,  
797 main effect of light:  $F_{1,46}=1.110$ ,  $p=0.722$ ; main effect of stress exposure:  $F_{2,46}=2.396$ ,  $p=0.102$ ;  
798 light-by-stress exposure interaction:  $F_{2,46}=0.328$ ,  $p=0.722$ ) or the novel object exploration task  
799 (Two-way repeated measures ANOVA, main effect of light:  $F_{1,47}=0.181$ ,  $p=0.673$ ; main effect of  
800 stress exposure:  $F_{2,47}=1.813$ ,  $p=0.174$ ; light-by-stress exposure interaction:  $F_{2,47}=1.880$ ,  
801  $p=0.164$ ). (F) There was no effect of light stimulation, stress exposure, or an interaction effect on  
802 the time spend rearing during either the social interaction (Two-way repeated measures ANOVA,  
803 main effect of light:  $F_{1,46}=0.189$ ,  $p=0.666$ ; main effect of stress exposure:  $F_{2,46}=1.046$ ,  $p=0.360$ ;  
804 light-by-stress exposure interaction:  $F_{2,46}=1.838$ ,  $p=0.171$ ) or the novel object exploration task  
805 (Two-way repeated measures ANOVA, main effect of light:  $F_{1,47}=0.083$ ,  $p=0.774$ ; main effect of  
806 stress exposure:  $F_{2,47}=0.401$ ,  $p=0.672$ ; light-by-stress exposure interaction:  $F_{2,47}=0.469$ ,  
807  $p=0.629$ ). (G) No significant effect of photoinhibition or stress exposure was observed on open  
808 arm exploration in the elevated plus maze assay (Two-way repeated measures ANOVA, main  
809 effect of light:  $F_{1,48}=0.495$ ,  $p=0.485$ ; main effect of stress exposure:  $F_{2,48}=0.279$ ,  $p=0.758$ ; light-  
810 by-stress exposure interaction:  $F_{2,48}=0.686$ ,  $p=0.509$ ). (H) Photoinhibition of VTA DA neurons did  
811 not produce a significant light-by-stress exposure interaction in open-field locomotion (Inset; two-  
812 way repeated measures ANOVA comparing summed 0-5 min light-OFF vs. 5-10 min light-ON  
813 locomotion by stress exposure interaction,  $F_{2,48}=0.41$ ,  $p=0.664$ ). (I) Photoinhibition effects on  
814 social interaction ( $\Delta$  social, ON-OFF) did not correlate with photoinhibition effects on locomotion  
815 ( $\Delta$  locomotion, ON-OFF) in any of the stress exposure groups (Pearson's correlation: non-  
816 stressed:  $r=-0.224$ ,  $p=0.423$ ; recently stressed:  $r=0.091$ ,  $p=0.738$ ; remotely stressed:  $r=0.100$ ,  
817  $p=0.684$ ).

818

Figure 2 - figure supplement 1

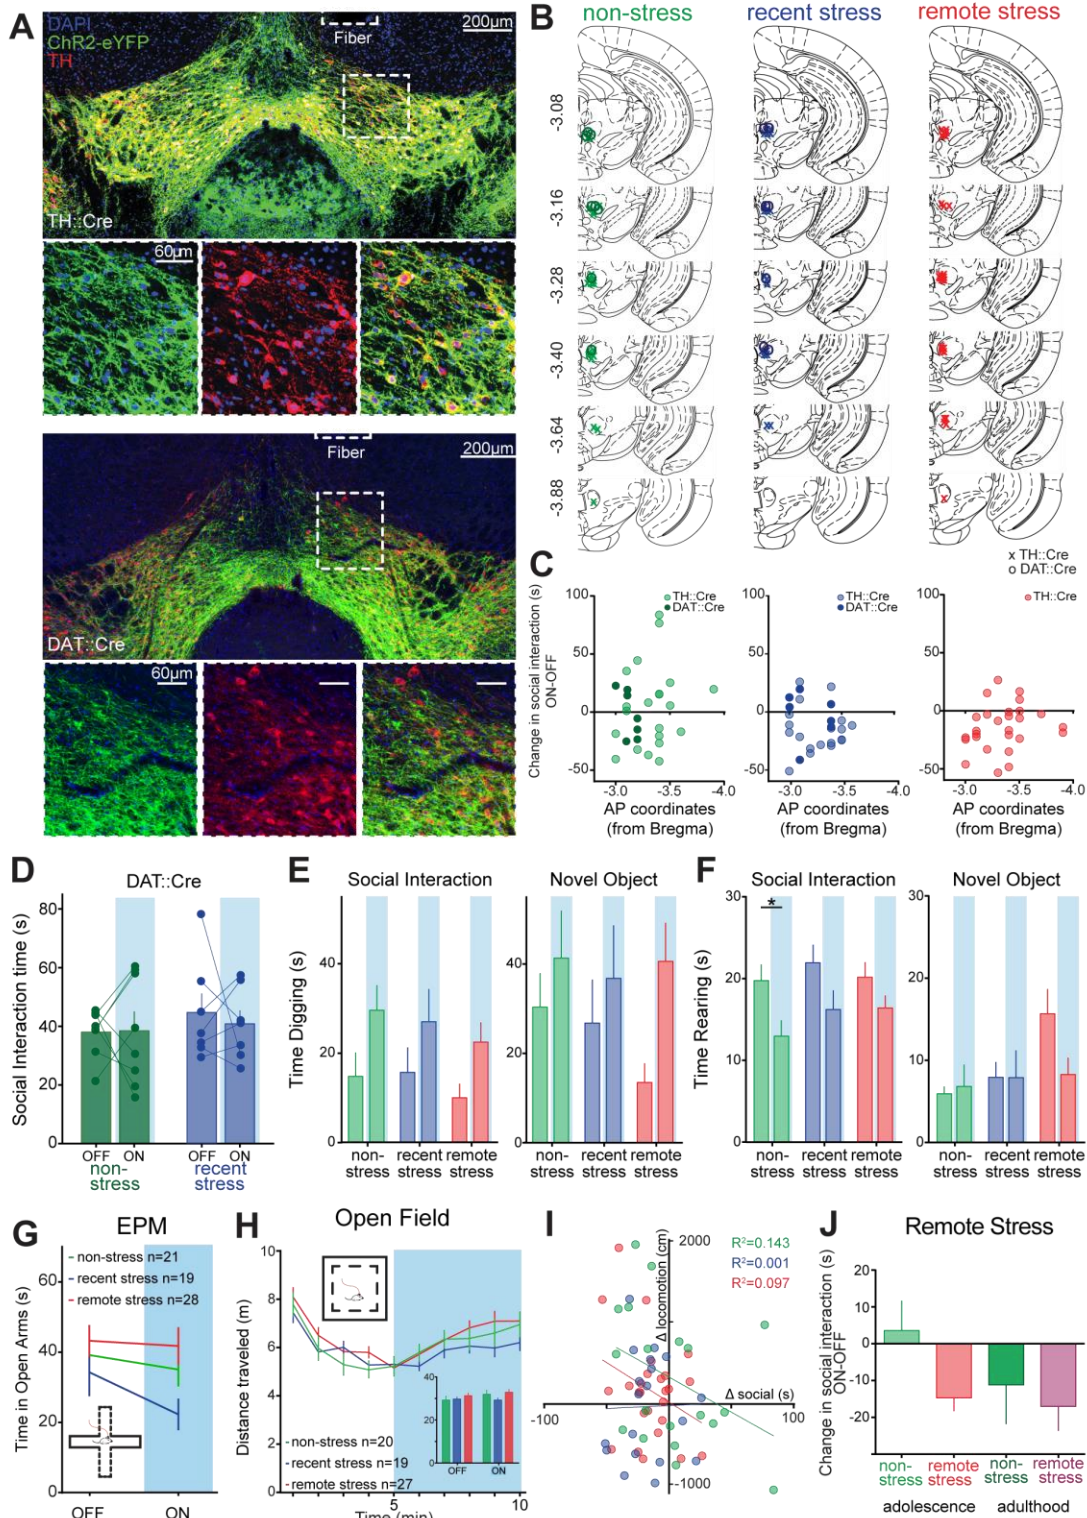



820 **Figure 2 – figure supplement 1**

821 (A) Confocal images of a 50  $\mu\text{m}$  thick coronal section containing the VTA of a TH::Cre female  
822 (upper panels) and a DAT::Cre female (lower panels) injected with AAV<sub>5</sub>-EF1 $\alpha$ -DIO-ChR2-eYFP.  
823 Thinly dotted white square: localization of the magnified images (40x; DAPI in blue; ChR2-eYFP  
824 in green; TH in red). (B) Histologically verified optical fiber placements for all subjects included in  
825 photostimulation experiment. Symbols represent termination of fiber tract for each group. (C)  
826 Scatter-plot of anterior-posterior (AP) fiber placement, measured from bregma, vs. social  
827 interaction difference scores (ON-OFF) in mice included in study. There was no correlation  
828 between AP of fiber placement and social interaction in any of the experimental groups. (D) Effect  
829 of photoactivation of VTA DA neurons in DAT::Cre mice in the social interaction assay. (E) There  
830 was no effect of stress exposure, or an interaction effect on the time spend digging, however there  
831 was a significant effect of light stimulation during both the social interaction (Two-way repeated  
832 measures ANOVA, main effect of light:  $F_{1,66}=16.82$ ,  $p=0.0001$ ; main effect of stress exposure:  
833  $F_{2,66}=0.685$ ,  $p=0.508$ ; light-by-stress exposure interaction:  $F_{2,66}=0.503$ ,  $p=0.607$ ;) and the novel  
834 object exploration task (Two-way repeated measures ANOVA, main effect of light:  $F_{1,27}=18.34$ ,  
835  $p=0.0002$ ; main effect of stress exposure:  $F_{2,27}=0.274$ ,  $p=0.763$ ; light-by-stress exposure  
836 interaction:  $F_{2,27}=2.318$ ,  $p=0.119$ ). (F) There was no effect of stress exposure, or an interaction  
837 effect on the time spend rearing, however there was a significant effect of light stimulation during  
838 the social interaction (Two-way repeated measures ANOVA, main effect of light:  $F_{1,66}=16.82$ ,  
839  $p=0.0001$ ; main effect of stress exposure:  $F_{2,66}=0.685$ ,  $p=0.508$ ; light-by-stress exposure  
840 interaction:  $F_{2,66}=0.503$ ,  $p=0.607$ ) but not the novel object exploration task (Two-way repeated  
841 measures ANOVA, main effect of light:  $F_{1,27}=1.843$ ,  $p=0.186$ ; main effect of stress exposure:  
842  $F_{2,27}=2.008$ ,  $p=0.154$ ; light-by-stress exposure interaction:  $F_{2,27}=2.769$ ,  $p=0.081$ ). (G) No  
843 significant effect of photoinhibition or stress exposure was observed on open arm exploration in  
844 the elevated plus maze assay (Two-way repeated measures ANOVA, main effect of light:  
845  $F_{1,65}=3.233$ ,  $p=0.077$ ; main effect of stress exposure:  $F_{2,65}=2.691$ ,  $p=0.075$ ; light-by-stress  
846 exposure interaction:  $F_{2,65}=0.917$ ,  $p=0.405$ ). (H) Photostimulation of VTA DA neurons did not  
847 produce a significant light-by-stress exposure interaction in open-field locomotion (Inset: Two-way  
848 repeated measures ANOVA comparing summed 0-5 min light-OFF vs. 5-10 min light-ON  
849 locomotion by stress exposure interaction,  $F_{2,63}=1.072$ ,  $p=0.349$ ). (I) Photostimulation effects on  
850 social interaction ( $\Delta$  social, ON-OFF) did not correlate with photostimulation effects on locomotion  
851 ( $\Delta$  locomotion, ON-OFF) in any of the stress exposure groups (Pearson's correlation: non-stress:  
852  $r=-0.378$ ,  $p=0.111$ ; recent stress:  $r=-0.023$ ,  $p=0.926$ ; remote stress:  $r=-0.311$ ,  $p=0.122$ ). (J) Mice  
853 remotely stressed during adulthood ( $n=10$ ) did not differ in the effect of photoactivation on social

854 interaction compared to mice remotely stressed during adolescence (n=29) tested at the same  
855 time (~P155; unpaired t-test:  $t_{37}=0.312$ ,  $p=0.757$ ).  
856

857  
858  
859

Figure 3- figure supplement 1

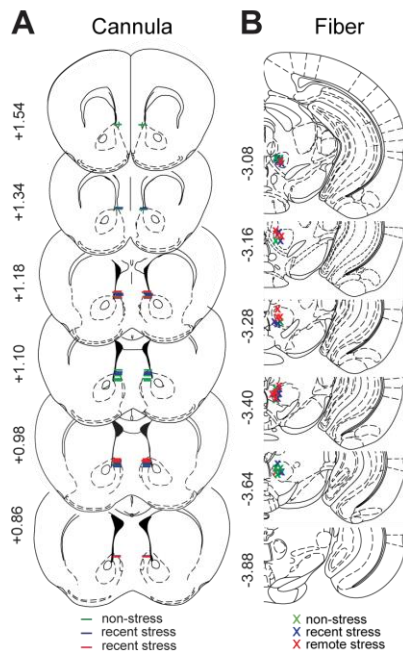

860  
861  
862  
863  
864  
865  
866  
867  
868  
869  
870

**Figure 3 – figure supplement 1**

(A) Histologically verified cannulae and (B) optical fiber placements for all subjects included in pharmacology experiments. Symbols represent termination of bilateral cannulae (line) or fiber tract (x) for each stress exposure group.

Figure 4 - figure supplement 1

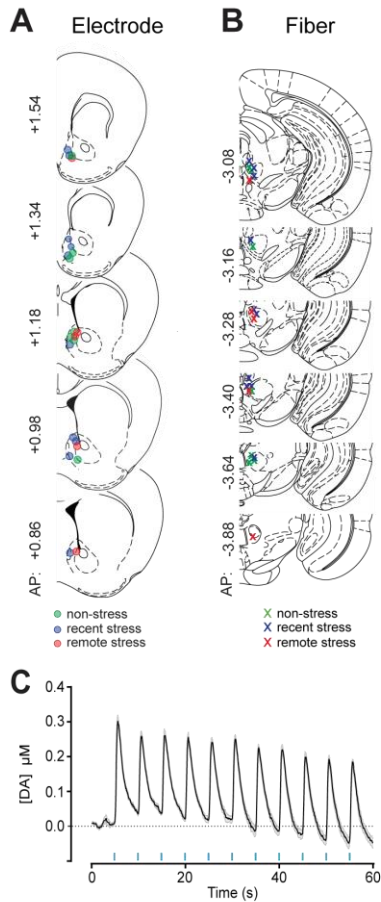

871

872

873

874 **Figure 4 – figure supplement 1**

875 (A) Histologically verified carbon fiber electrode and (B) optical fiber placements for all subjects  
876 included in the voltammetry experiments. Symbols represent termination of electrode (circle) or  
877 optic fiber tract (x) for each stress exposure group. (C) Optical stimulation parameters (eight 5 ms  
878 pulses of blue light delivered at 30 Hz every 5 s) employed during behavioral experiments caused  
879 reliable DA release in the NAc.

## 880 References

- 881 Abercrombie, E.D., Keefe, K.A., DiFrischia, D.S., and Zigmond, M.J. (1989). Differential effect of stress on  
882 in vivo dopamine release in striatum, nucleus accumbens, and medial frontal cortex. *J. Neurochem.* *52*,  
883 1655–1658.
- 884 Afonso, V.M., King, S.J., Novakov, M., Burton, C.L., and Fleming, A.S. (2011). Accumbal dopamine func-  
885 tion in postpartum rats that were raised without their mothers. *Horm. Behav.* *60*, 632–643.
- 886 Anker, J.J., and Carroll, M.E. (2011). Females are more vulnerable to drug abuse than males: evidence  
887 from preclinical studies and the role of ovarian hormones. *Curr. Top. Behav. Neurosci.* *8*, 73–96.
- 888 Aragona, B.J., Cleaveland, N.A., Stuber, G.D., Day, J.J., Carelli, R.M., and Wightman, R.M. (2008). Prefer-  
889 ential enhancement of dopamine transmission within the nucleus accumbens shell by cocaine is at-  
890 tributable to a direct increase in phasic dopamine release events. *J. Neurosci. Off. J. Soc. Neurosci.* *28*,  
891 8821–8831.
- 892 Arnsten, A. (1997). Catecholamine regulation of the prefrontal cortex. *J Psychopharmacol Oxf Engl* *11*,  
893 151–162.
- 894 Arnsten, A.F.T. (2009). Stress signalling pathways that impair prefrontal cortex structure and function.  
895 *Nat. Rev. Neurosci.* *10*, 410–422.
- 896 Badrinarayan, A., Wescott, S.A., Vander Weele, C.M., Saunders, B.T., Couturier, B.E., Maren, S., and  
897 Aragona, B.J. (2012). Aversive stimuli differentially modulate real-time dopamine transmission dynamics  
898 within the nucleus accumbens core and shell. *J. Neurosci. Off. J. Soc. Neurosci.* *32*, 15779–15790.
- 899 Bale, T.L., and Epperson, C.N. (2015). Sex differences and stress across the lifespan. *Nat. Neurosci.* *18*,  
900 1413–1420.
- 901 Bangasser, D.A., and Valentino, R.J. (2014). Sex differences in stress-related psychiatric disorders: neuro-  
902 biological perspectives. *Front. Neuroendocrinol.* *35*, 303–319.
- 903 Bangasser, D.A., and Wicks, B. (2017). Sex-specific mechanisms for responding to stress. *J. Neurosci. Res.*  
904 *95*, 75–82.
- 905 Bergan, J.F., Ben-Shaul, Y., and Dulac, C. (2014). Sex-specific processing of social cues in the medial  
906 amygdala. *ELife* *3*, e02743.
- 907 Brady, K.T., and Sinha, R. (2005). Co-occurring mental and substance use disorders: the neurobiological  
908 effects of chronic stress. *Am. J. Psychiatry* *162*, 1483–1493.
- 909 Brake, W.G., Zhang, T.Y., Diorio, J., Meaney, M.J., and Gratton, A. (2004). Influence of early postnatal  
910 rearing conditions on mesocorticolimbic dopamine and behavioural responses to psychostimulants and  
911 stressors in adult rats. *Eur. J. Neurosci.* *19*, 1863–1874.

- 912 Byers, S.L., Wiles, M.V., Dunn, S.L., and Taft, R.A. (2012). Mouse estrous cycle identification tool and im-  
913 ages. *PloS One* 7, e35538.
- 914 Cabib, S., and Puglisi-Allegra, S. (1996). Different effects of repeated stressful experiences on mesocorti-  
915 cal and mesolimbic dopamine metabolism. *Neuroscience* 73, 375–380.
- 916 Cahill, L. (2006). Why sex matters for neuroscience. *Nat. Rev. Neurosci.* 7, 477–484.
- 917 Calhoun, G.G., and Tye, K.M. (2015). Resolving the neural circuits of anxiety. *Nat. Neurosci.* 18, 1394–  
918 1404.
- 919 Calipari, E.S., Juarez, B., Morel, C., Walker, D.M., Cahill, M.E., Ribeiro, E., Roman-Ortiz, C., Ramakrishnan,  
920 C., Deisseroth, K., Han, M.-H., et al. (2017). Dopaminergic dynamics underlying sex-specific cocaine re-  
921 ward. *Nat. Commun.* 8, 13877.
- 922 Campi, K.L., Greenberg, G.D., Kapoor, A., Ziegler, T.E., and Trainor, B.C. (2014). Sex differences in effects  
923 of dopamine D1 receptors on social withdrawal. *Neuropharmacology* 77, 208–216.
- 924 Cao, J.-L., Covington, H.E., Friedman, A.K., Wilkinson, M.B., Walsh, J.J., Cooper, D.C., Nestler, E.J., and  
925 Han, M.-H. (2010). Mesolimbic dopamine neurons in the brain reward circuit mediate susceptibility to  
926 social defeat and antidepressant action. *J. Neurosci. Off. J. Soc. Neurosci.* 30, 16453–16458.
- 927 Carola, V., D’Olimpio, F., Brunamonti, E., Mangia, F., and Renzi, P. (2002). Evaluation of the elevated  
928 plus-maze and open-field tests for the assessment of anxiety-related behaviour in inbred mice. *Behav.*  
929 *Brain Res.* 134, 49–57.
- 930 Carpenter, T., Grecian, S.M., and Reynolds, R.M. (2017). Sex differences in early-life programming of the  
931 hypothalamic-pituitary-adrenal axis in humans suggest increased vulnerability in females: a systematic  
932 review. *J. Dev. Orig. Health Dis.* 1–12.
- 933 Chaudhury, D., Walsh, J.J., Friedman, A.K., Juarez, B., Ku, S.M., Koo, J.W., Ferguson, D., Tsai, H.-C., Pom-  
934 eranz, L., Christoffel, D.J., et al. (2013). Rapid regulation of depression-related behaviours by control of  
935 midbrain dopamine neurons. *Nature* 493, 532–536.
- 936 Chetty, S., Friedman, A.R., Taravosh-Lahn, K., Kirby, E.D., Mirescu, C., Guo, F., Krupik, D., Nicholas, A.,  
937 Geraghty, A.C., Krishnamurthy, A., et al. (2014). Stress and glucocorticoids promote oligodendrogenesis  
938 in the adult hippocampus. *Mol. Psychiatry* 19, 1275–1283.
- 939 Chrousos, G.P. (2009). Stress and disorders of the stress system. *Nat. Rev. Endocrinol.* 5, 374–381.
- 940 Dalla, C., Antoniou, K., Drossopoulou, G., Xagoraris, M., Kokras, N., Sfikakis, A., and Papadopoulou-  
941 Daifoti, Z. (2005). Chronic mild stress impact: are females more vulnerable? *Neuroscience* 135, 703–714.
- 942 Day, J.J., Roitman, M.F., Wightman, R.M., and Carelli, R.M. (2007). Associative learning mediates dy-  
943 namic shifts in dopamine signaling in the nucleus accumbens. *Nat. Neurosci.* 10, 1020–1028.

- 944 Di Chiara, G., Loddo, P., and Tanda, G. (1999). Reciprocal changes in prefrontal and limbic dopamine re-  
945 sponsiveness to aversive and rewarding stimuli after chronic mild stress: implications for the psychobiol-  
946 ogy of depression. *Biol. Psychiatry* *46*, 1624–1633.
- 947 Dube, S.R., Felitti, V.J., Dong, M., Chapman, D.P., Giles, W.H., and Anda, R.F. (2003). Childhood abuse,  
948 neglect, and household dysfunction and the risk of illicit drug use: the adverse childhood experiences  
949 study. *Pediatrics* *111*, 564–572.
- 950 Duchesne, A., Dufresne, M.M., and Sullivan, R.M. (2009). Sex differences in corticolimbic dopamine and  
951 serotonin systems in the rat and the effect of postnatal handling. *Prog. Neuropsychopharmacol. Biol.*  
952 *Psychiatry* *33*, 251–261.
- 953 Dulac, C., and Kimchi, T. (2007). Neural mechanisms underlying sex-specific behaviors in vertebrates.  
954 *Curr. Opin. Neurobiol.* *17*, 675–683.
- 955 Felix-Ortiz, A.C., and Tye, K.M. (2014). Amygdala inputs to the ventral hippocampus bidirectionally mod-  
956 ulate social behavior. *J. Neurosci. Off. J. Soc. Neurosci.* *34*, 586–595.
- 957 Felix-Ortiz, A.C., Burgos-Robles, A., Bhagat, N.D., Leppla, C.A., and Tye, K.M. (2016). Bidirectional modu-  
958 lation of anxiety-related and social behaviors by amygdala projections to the medial prefrontal cortex.  
959 *Neuroscience* *321*, 197–209.
- 960 Fone, K.C.F., and Porkess, M.V. (2008). Behavioural and neurochemical effects of post-weaning social  
961 isolation in rodents-relevance to developmental neuropsychiatric disorders. *Neurosci. Biobehav. Rev.*  
962 *32*, 1087–1102.
- 963 Goel, N., and Bale, T.L. (2009). Examining the intersection of sex and stress in modelling neuropsychiatric  
964 disorders. *J. Neuroendocrinol.* *21*, 415–420.
- 965 Gold, P.W. (2015). The organization of the stress system and its dysregulation in depressive illness. *Mol.*  
966 *Psychiatry* *20*, 32–47.
- 967 Gruene, T.M., Flick, K., Stefano, A., Shea, S.D., and Shansky, R.M. (2015). Sexually divergent expression  
968 of active and passive conditioned fear responses in rats. *ELife* *4*.
- 969 Gunaydin, L.A., Grosenick, L., Finkelstein, J.C., Kauvar, I.V., Fenno, L.E., Adhikari, A., Lammel, S., Mir-  
970 zabekov, J.J., Airan, R.D., Zalocusky, K.A., et al. (2014). Natural neural projection dynamics underlying  
971 social behavior. *Cell* *157*, 1535–1551.
- 972 Handa, R.J., Burgess, L.H., Kerr, J.E., and O’Keefe, J.A. (1994). Gonadal steroid hormone receptors and  
973 sex differences in the hypothalamo-pituitary-adrenal axis. *Horm. Behav.* *28*, 464–476.
- 974 Haney, M., Maccari, S., Le Moal, M., Simon, H., and Piazza, P.V. (1995). Social stress increases the acqui-  
975 sition of cocaine self-administration in male and female rats. *Brain Res.* *698*, 46–52.
- 976 Holly, E.N., and Miczek, K.A. (2016). Ventral tegmental area dopamine revisited: effects of acute and re-  
977 peated stress. *Psychopharmacology (Berl.)* *233*, 163–186.

- 978 Holly, E.N., Shimamoto, A., Debold, J.F., and Miczek, K.A. (2012). Sex differences in behavioral and neu-  
979 ral cross-sensitization and escalated cocaine taking as a result of episodic social defeat stress in rats. *Psy-*  
980 *chopharmacology (Berl.)* 224, 179–188.
- 981 Imperato, A., Angelucci, L., Casolini, P., Zocchi, A., and Puglisi-Allegra, S. (1992). Repeated stressful expe-  
982 riences differently affect limbic dopamine release during and following stress. *Brain Res.* 577, 194–199.
- 983 Johnston, J.H., Linden, D.E.J., and van den Bree, M.B.M. (2016). Combining Stress and Dopamine Based  
984 Models of Addiction: Towards a Psycho-Neuro-Endocrinological Theory of Addiction. *Curr. Drug Abuse*  
985 *Rev.* 9, 61–74.
- 986 Kalivas, P.W., and Duffy, P. (1995). Selective activation of dopamine transmission in the shell of the nu-  
987 cleus accumbens by stress. *Brain Res.* 675, 325–328.
- 988 Karkhanis, A.N., Rose, J.H., Weiner, J.L., and Jones, S.R. (2016). Early-Life Social Isolation Stress Increases  
989 Kappa Opioid Receptor Responsiveness and Downregulates the Dopamine System. *Neuropsychophar-*  
990 *macol. Off. Publ. Am. Coll. Neuropsychopharmacol.* 41, 2263–2274.
- 991 Kessler, R.C. (2003). Epidemiology of women and depression. *J. Affect. Disord.* 74, 5–13.
- 992 Kessler, R.C., McGonagle, K.A., Zhao, S., Nelson, C.B., Hughes, M., Eshleman, S., Wittchen, H.U., and  
993 Kendler, K.S. (1994). Lifetime and 12-month prevalence of DSM-III-R psychiatric disorders in the United  
994 States. Results from the National Comorbidity Survey. *Arch. Gen. Psychiatry* 51, 8–19.
- 995 Koenig, J.I., Walker, C.-D., Romeo, R.D., and Lupien, S.J. (2011). Effects of stress across the lifespan.  
996 *Stress Amst. Neth.* 14, 475–480.
- 997 Koob, G.F., and Volkow, N.D. (2016). Neurobiology of addiction: a neurocircuitry analysis. *Lancet Psychi-*  
998 *atry* 3, 760–773.
- 999 Krishnan, V., Han, M.-H., Graham, D.L., Berton, O., Renthal, W., Russo, S.J., Laplant, Q., Graham, A., Lut-  
1000 ter, M., Lagace, D.C., et al. (2007). Molecular adaptations underlying susceptibility and resistance to so-  
1001 cial defeat in brain reward regions. *Cell* 131, 391–404.
- 1002 Laman-Maharg, A., and Trainor, B.C. (2017). Stress, sex, and motivated behaviors. *J. Neurosci. Res.* 95,  
1003 83–92.
- 1004 Lammel, S., Ion, D.I., Roeper, J., and Malenka, R.C. (2011). Projection-Specific Modulation of Dopamine  
1005 Neuron Synapses by Aversive and Rewarding Stimuli. *Neuron* 70, 855–862.
- 1006 Lammel, S., Lim, B.K., Ran, C., Huang, K.W., Betley, M.J., Tye, K.M., Deisseroth, K., and Malenka, R.C.  
1007 (2012). Input-specific control of reward and aversion in the ventral tegmental area. *Nature* 491, 212–  
1008 217.
- 1009 Lammel, S., Steinberg, E.E., Földy, C., Wall, N.R., Beier, K., Luo, L., and Malenka, R.C. (2015). Diversity of  
1010 transgenic mouse models for selective targeting of midbrain dopamine neurons. *Neuron* 85, 429–438.



- 1011 Lapiz, M.D.S., Fulford, A., Muchimapura, S., Mason, R., Parker, T., and Marsden, C.A. (2003). Influence of  
1012 postweaning social isolation in the rat on brain development, conditioned behavior, and neurotransmis-  
1013 sion. *Neurosci. Behav. Physiol.* *33*, 13–29.
- 1014 Lemos, J.C., Wanat, M.J., Smith, J.S., Reyes, B.A.S., Hollon, N.G., Van Bockstaele, E.J., Chavkin, C., and  
1015 Phillips, P.E.M. (2012). Severe stress switches CRF action in the nucleus accumbens from appetitive to  
1016 aversive. *Nature* *490*, 402–406.
- 1017 Lin, Y., Westenbroek, C., Bakker, P., Termeer, J., Liu, A., Li, X., and Ter Horst, G.J. (2008). Effects of long-  
1018 term stress and recovery on the prefrontal cortex and dentate gyrus in male and female rats. *Cereb. Cor-  
1019 tex N. Y. N* *1991* *18*, 2762–2774.
- 1020 Logrip, M.L., Zorrilla, E.P., and Koob, G.F. (2012). Stress modulation of drug self-administration: implica-  
1021 tions for addiction comorbidity with post-traumatic stress disorder. *Neuropharmacology* *62*, 552–564.
- 1022 Lovic, V., Fleming, A.S., and Fletcher, P.J. (2006). Early life tactile stimulation changes adult rat respon-  
1023 siveness to amphetamine. *Pharmacol. Biochem. Behav.* *84*, 497–503.
- 1024 Lowery, E.G., Sparrow, A.M., Breese, G.R., Knapp, D.J., and Thiele, T.E. (2008). The CRF-1 receptor antag-  
1025 onist, CP-154,526, attenuates stress-induced increases in ethanol consumption by BALB/cJ mice. *Alco-  
1026 hol. Clin. Exp. Res.* *32*, 240–248.
- 1027 Luine, V. (2002). Sex differences in chronic stress effects on memory in rats. *Stress Amst. Neth.* *5*, 205–  
1028 216.
- 1029 Mah, L., Szabuniewicz, C., and Fiocco, A.J. (2016). Can anxiety damage the brain? *Curr. Opin. Psychiatry*  
1030 *29*, 56–63.
- 1031 Mantz, J., Thierry, A.M., and Glowinski, J. (1989). Effect of noxious tail pinch on the discharge rate of  
1032 mesocortical and mesolimbic dopamine neurons: selective activation of the mesocortical system. *Brain*  
1033 *Res.* *476*, 377–381.
- 1034 Marcondes, F.K., Bianchi, F.J., and Tanno, A.P. (2002). Determination of the estrous cycle phases of rats:  
1035 some helpful considerations. *Braz. J. Biol. Rev. Brasleira Biol.* *62*, 609–614.
- 1036 Matthews, G. (2016). Dorsal Raphe Dopamine Neurons Represent the Experience of Social Isolation. *Cell*  
1037 *164*, 617–631.
- 1038 Matthews, K., and Robbins, T.W. (2003). Early experience as a determinant of adult behavioural re-  
1039 sponses to reward: the effects of repeated maternal separation in the rat. *Neurosci. Biobehav. Rev.* *27*,  
1040 45–55.
- 1041 Matthews, G.A., Nieh, E.H., Vander Weele, C.M., Halbert, S.A., Pradhan, R.V., Yosafat, A.S., Glober, G.F.,  
1042 Izmehr, E.M., Thomas, R.E., Lacy, G.D., et al. (2016). Dorsal Raphe Dopamine Neurons Represent the  
1043 Experience of Social Isolation. *Cell* *164*, 617–631.

- 1044 McEwen, B.S., Bowles, N.P., Gray, J.D., Hill, M.N., Hunter, R.G., Karatsoreos, I.N., and Nasca, C. (2015).  
1045 Mechanisms of stress in the brain. *Nat. Neurosci.* *18*, 1353–1363.
- 1046 Nestler, E.J., and Carlezon, W.A. (2006). The mesolimbic dopamine reward circuit in depression. *Biol.*  
1047 *Psychiatry* *59*, 1151–1159.
- 1048 Nieh, E.H., Vander Weele, C.M., Matthews, G.A., Presbrey, K.N., Wichmann, R., Leppla, C.A., Izadmehr,  
1049 E.M., and Tye, K.M. (2016). Inhibitory Input from the Lateral Hypothalamus to the Ventral Tegmental  
1050 Area Disinhibits Dopamine Neurons and Promotes Behavioral Activation. *Neuron* *90*, 1286–1298.
- 1051 Niesink, R.J.M., and Van Ree, J.M. (1982). Short-term isolation increases social interactions of male rats:  
1052 A parametric analysis. *Physiol. Behav.* *29*, 819–825.
- 1053 Panksepp, J., and Beatty, W.W. (1980). Social deprivation and play in rats. *Behav. Neural Biol.* *30*, 197–  
1054 206.
- 1055 Pattwell, S.S., Duhoux, S., Hartley, C.A., Johnson, D.C., Jing, D., Elliott, M.D., Ruberry, E.J., Powers, A.,  
1056 Mehta, N., Yang, R.R., et al. (2012). Altered fear learning across development in both mouse and human.  
1057 *Proc. Natl. Acad. Sci.* *109*, 16318–16323.
- 1058 Pellow, S., Chopin, P., File, S.E., and Briley, M. (1985). Validation of open : closed arm entries in an ele-  
1059 vated plus-maze as a measure of anxiety in the rat. *J. Neurosci. Methods* *14*, 149–167.
- 1060 Phillips, P.E.M., Stuber, G.D., Heien, M.L.A.V., Wightman, R.M., and Carelli, R.M. (2003). Subsecond do-  
1061 pamine release promotes cocaine seeking. *Nature* *422*, 614–618.
- 1062 Piazza, P.V., and Le Moal, M. (1998). The role of stress in drug self-administration. *Trends Pharmacol.*  
1063 *Sci.* *19*, 67–74.
- 1064 Piazza, P.V., and Le Moal, M.L. (1996). Pathophysiological basis of vulnerability to drug abuse: role of an  
1065 interaction between stress, glucocorticoids, and dopaminergic neurons. *Annu. Rev. Pharmacol. Toxicol.*  
1066 *36*, 359–378.
- 1067 Preller, K.H., Herdener, M., Schilbach, L., Stämpfli, P., Hulka, L.M., Vonmoos, M., Ingold, N., Vogeley, K.,  
1068 Tobler, P.N., Seifritz, E., et al. (2014). Functional changes of the reward system underlie blunted re-  
1069 sponse to social gaze in cocaine users. *Proc. Natl. Acad. Sci. U. S. A.* *111*, 2842–2847.
- 1070 Robinson, D.L., Heien, M.L.A.V., and Wightman, R.M. (2002). Frequency of dopamine concentration  
1071 transients increases in dorsal and ventral striatum of male rats during introduction of conspecifics. *J.*  
1072 *Neurosci. Off. J. Soc. Neurosci.* *22*, 10477–10486.
- 1073 Roitman, M.F., Stuber, G.D., Phillips, P.E.M., Wightman, R.M., and Carelli, R.M. (2004). Dopamine oper-  
1074 ates as a subsecond modulator of food seeking. *J. Neurosci. Off. J. Soc. Neurosci.* *24*, 1265–1271.
- 1075 Roitman, M.F., Wheeler, R.A., Wightman, R.M., and Carelli, R.M. (2008). Real-time chemical responses in  
1076 the nucleus accumbens differentiate rewarding and aversive stimuli. *Nat. Neurosci.* *11*, 1376–1377.

- 1077 Russo, S.J., and Nestler, E.J. (2013). The Brain Reward Circuitry in Mood Disorders. *Nat. Rev. Neurosci.*  
1078 14.
- 1079 Saal, D., Dong, Y., Bonci, A., and Malenka, R.C. (2003). Drugs of abuse and stress trigger a common syn-  
1080 aptic adaptation in dopamine neurons. *Neuron* 37, 577–582.
- 1081 Sandi, C., and Haller, J. (2015). Stress and the social brain: behavioural effects and neurobiological mech-  
1082 anisms. *Nat. Rev. Neurosci.* 16, 290–304.
- 1083 Schneiderman, N., Ironson, G., and Siegel, S.D. (2005). STRESS AND HEALTH: Psychological, Behavioral,  
1084 and Biological Determinants. *Annu. Rev. Clin. Psychol.* 1, 607–628.
- 1085 Schultz, W. (1998). Predictive reward signal of dopamine neurons. *J. Neurophysiol.* 80, 1–27.
- 1086 Shaham, Y., Shalev, U., Lu, L., De Wit, H., and Stewart, J. (2003). The reinstatement model of drug re-  
1087 lapse: history, methodology and major findings. *Psychopharmacology (Berl.)* 168, 3–20.
- 1088 Shansky, R.M., and Lipps, J. (2013). Stress-induced cognitive dysfunction: hormone-neurotransmitter in-  
1089 teractions in the prefrontal cortex. *Front. Hum. Neurosci.* 7, 123.
- 1090 Shimamoto, A., Debold, J.F., Holly, E.N., and Miczek, K.A. (2011). Blunted accumbal dopamine response  
1091 to cocaine following chronic social stress in female rats: exploring a link between depression and drug  
1092 abuse. *Psychopharmacology (Berl.)* 218, 271–279.
- 1093 Shimamoto, A., Holly, E.N., Boyson, C.O., DeBold, J.F., and Miczek, K.A. (2015). Individual differences in  
1094 anhedonic and accumbal dopamine responses to chronic social stress and their link to cocaine self-ad-  
1095 ministration in female rats. *Psychopharmacology (Berl.)* 232, 825–834.
- 1096 Sinha, R. (2008). Chronic stress, drug use, and vulnerability to addiction. *Ann. N. Y. Acad. Sci.* 1141, 105–  
1097 130.
- 1098 Solomon, M.B. (2017). Evaluating social defeat as a model for psychopathology in adult female rodents.  
1099 *J. Neurosci. Res.* 95, 763–776.
- 1100 Stuber, G.D., Stamatakis, A.M., and Kantak, P.A. (2015). Considerations when using cre-driver rodent  
1101 lines for studying ventral tegmental area circuitry. *Neuron* 85, 439–445.
- 1102 Taylor, S.E., Klein, L.C., Lewis, B.P., Gruenewald, T.L., Gurung, R.A., and Updegraff, J.A. (2000). Biobehav-  
1103 ioral responses to stress in females: tend-and-befriend, not fight-or-flight. *Psychol. Rev.* 107, 411–429.
- 1104 Ter Horst, G.J., Wichmann, R., Gerrits, M., Westenbroek, C., and Lin, Y. (2009). Sex differences in stress  
1105 responses: focus on ovarian hormones. *Physiol. Behav.* 97, 239–249.
- 1106 Thierry, A.M., Tassin, J.P., Blanc, G., and Glowinski, J. (1976). Selective activation of mesocortical DA sys-  
1107 tem by stress. *Nature* 263, 242–244.

- 1108 Thomas, M.B., Hu, M., Lee, T.M., Bhatnagar, S., and Becker, J.B. (2009). Sex-specific susceptibility to co-  
1109 caine in rats with a history of prenatal stress. *Physiol. Behav.* *97*, 270–277.
- 1110 Tidey, J.W., and Miczek, K.A. (1996). Social defeat stress selectively alters mesocorticolimbic dopamine  
1111 release: an in vivo microdialysis study. *Brain Res.* *721*, 140–149.
- 1112 Trainor, B.C. (2011). Stress responses and the mesolimbic dopamine system: social contexts and sex dif-  
1113 ferences. *Horm. Behav.* *60*, 457–469.
- 1114 Trainor, B.C., Pride, M.C., Villalon Landeros, R., Knoblauch, N.W., Takahashi, E.Y., Silva, A.L., and Crean,  
1115 K.K. (2011). Sex differences in social interaction behavior following social defeat stress in the monoga-  
1116 mous California mouse (*Peromyscus californicus*). *PLoS One* *6*, e17405.
- 1117 Tye, K.M., Mirzabekov, J.J., Warden, M.R., Ferenczi, E.A., Tsai, H.-C., Finkelstein, J., Kim, S.-Y., Adhikari,  
1118 A., Thompson, K.R., Andalman, A.S., et al. (2013). Dopamine neurons modulate neural encoding and ex-  
1119 pression of depression-related behaviour. *Nature* *493*, 537–541.
- 1120 Valenti, O., Gill, K.M., and Grace, A.A. (2012). Different stressors produce excitation or inhibition of  
1121 mesolimbic dopamine neuron activity: response alteration by stress pre-exposure. *Eur. J. Neurosci.* *35*,  
1122 1312–1321.
- 1123 Varlinskaya, E.I., Spear, L.P., and Spear, N.E. (1999). Social Behavior and Social Motivation in Adolescent  
1124 Rats: Role of Housing Conditions and Partner’s Activity. *Physiol. Behav.* *67*, 475–482.
- 1125 Volkow, N.D., Baler, R.D., and Goldstein, R.Z. (2011). Addiction: pulling at the neural threads of social  
1126 behaviors. *Neuron* *69*, 599–602.
- 1127 Wightman, R.M., and Robinson, D.L. (2002). Transient changes in mesolimbic dopamine and their associ-  
1128 ation with “reward.” *J. Neurochem.* *82*, 721–735.
- 1129 Wise, R.A. (2008). Dopamine and reward: The anhedonia hypothesis 30 years on. *Neurotox. Res.* *14*,  
1130 169–183.
- 1131 Witten, I.B., Steinberg, E.E., Lee, S.Y., Davidson, T.J., Zalocusky, K.A., Brodsky, M., Yizhar, O., Cho, S.L.,  
1132 Gong, S., Ramakrishnan, C., et al. (2011). Recombinase-Driver Rat Lines: Tools, Techniques, and Optoge-  
1133 netic Application to Dopamine-Mediated Reinforcement. *Neuron* *72*, 721–733.
- 1134 Yerkes, R.M., and Dodson, J.D. (1908). The relation of strength of stimulus to rapidity of habit-formation.  
1135 *J. Comp. Neurol. Psychol.* *18*, 459–482.
- 1136 Yorgason, J.T., España, R.A., Konstantopoulos, J.K., Weiner, J.L., and Jones, S.R. (2013). Enduring in-  
1137 creases in anxiety-like behavior and rapid nucleus accumbens dopamine signaling in socially isolated  
1138 rats. *Eur. J. Neurosci.* *37*, 1022–1031.
- 1139 Yorgason, J.T., Calipari, E.S., Ferris, M.J., Karkhanis, A.N., Fordahl, S.C., Weiner, J.L., and Jones, S.R.  
1140 (2016). Social isolation rearing increases dopamine uptake and psychostimulant potency in the striatum.  
1141 *Neuropharmacology* *101*, 471–479.

1142
